# Supplementary material for: Risk factors for in-hospital mortality after coronary artery bypass grafting in patients 80 years old or older: a retrospective case-series study
Source: PeerJ. 2016 Dec 1;4:e2667. doi: 10.7717/peerj.2667 (PMC5136134; doi:10.7717/peerj.2667)
Supplement: Data S1 [file peerj-04-2667-s001.xlsx]

## Sheet: Arkusz1
			BASELINE																							INTRAOPERATIVE										POSTOPERATIVE
	date		Age	Sex	Weight [kg]	Height [m]	Height^2	BMI	HA	DM	hiperlipidemia	COPD	PAD	TIA, stroke	CCS	NYHA	MI	PCI	CKD	AF	ADMISSION		diseased vessels	LM	EF	grafts	LIMA	RIMA	RA	SVG	OPCABG	CABG	TIME			NO COMPLICATIONS	COMPLICATIONS	RETHORACOTOMY	NEUROLOGICAL	RESPIRATORY	KIDNEY	GI BLEEDING	MODS	MI	IABP NO MI	BYPASS ANGIOGRAPHY NO MI	STERNAL DEHISCENCE	DEATH	NO TRANSFUSIONS
Pt No				M=1 F=0		(metry BMI)	kwadrat (BMI)														EMERGENT	ELECTIVE	No			No							ECC	aortic clamp	surgery
1	2010-06-08	24212/2010	86	1	61	1.7	2.89	21.1073	1	1	0	0	0	0	3	3	1	1	0	1	0	1	3	0	36	2	1	0	0	1	0	1	150	40	5h	1	0	0	0	0	0	0	0	0	0	0	0	0	0
2	2010-05-17	9572/2010	85	1	84	1.7	2.89	29.0657	1	0	0	0	1	1	2	2	1	0	1	0	0	1	3	1	48	3	0	0	0	3	0	1	135	82	5h	0	1	0	0	0	0	0	0	0	0	0	1	0	0
3	2010-04-28	3811/2010	87	1	75	1.61	2.5921	28.9341	1	1	0	0	0	0	3	3	1	1	1	1	1	0	3	0	40	2	0	0	0	2	0	1	69	36	3h30'	1	0	0	0	0	0	0	0	0	0	0	0	0	0
4	2010-04-15	7327/2010	87	1	95	1.85	3.4225	27.7575	1	0	1	0	0	1	4	3	1	0	0	0	1	0	3	0	50	2	0	0	0	2	0	1	75	32	3h50'	1	0	0	0	0	0	0	0	0	0	0	0	0	0
5	2010-04-12	7105/2010	84	1	52	1.7	2.89	17.9931	0	0	0	1	0	0	3	3	2	0	0	0	1	0	3	1	18	2	0	0	0	1	0	1	100	28	3h30'	0	1	0	0	0	0	0	0	0	1	0	0	1	0
6	2010-04-07	6572/2010	82	1	89	1.68	2.8224	31.5334	1	1	1	0	0	0	3	2	0	0	0	0	0	1	3	1	40	3	1	0	0	2	0	1	85	52	4h40'	1	0	0	0	0	0	0	0	0	0	0	0	0	0
7	2010-04-07	6578/2010	80	1	73	1.66	2.7556	26.4915	1	0	1	0	0	0	3	2	2	1	0	0	0	1	2	1	45	3	0	0	0	3	0	1	121	75	5h25'	1	0	0	0	0	0	0	0	0	0	0	0	0	0
8	2010-04-06	6498/2010	82	0	62	1.3	1.69	36.6864	0	1	0	0	0	0	4	2	1	0	0	0	1	0	3	1	60	2	0	0	0	2	0	1	78	32	3h15'	1	0	0	0	0	0	0	0	0	0	0	0	0	0
9	2010-12-30	24150/2010	83	1	53	1.52	2.3104	22.9398	0	0	0	0	0	0	4	3	1	1	0	0	1	0	3	1	60	2	0	0	0	2	0	1	60	30	3h30'	0	1	1	0	0	0	0	0	0	0	0	0	0	0
10	2010-12-11	23222/2010	82	1	74	1.76	3.0976	23.8895	1	0	0	0	0	0	4	2	1	0	0	0	1	0	1	1	30	2	0	0	0	0	0	1	71	31	4h40'	0	1	0	0	1	0	0	0	0	0	0	0	0	0
11	2010-12-06	22497/2010	80	1	70	1.72	2.9584	23.6614	1	0	0	0	1	1	3	2	1	0	0	0	0	1	3	0	45	1	0	0	0	1	0	1	50	27	2h20'	1	0	0	0	0	0	0	0	0	0	0	0	0	0
12	2010-11-30	22467/2010	82	1	87	1.71	2.9241	29.7527	1	1	0	0	0	0	2	2	0	0	1	0	0	1	3	0	55	2	0	0	0	2	0	1	81	40	6h	1	0	0	0	0	0	0	0	0	0	0	0	0	0
13	2010-11-27	22325/2010	80	1	110	1.78	3.1684	34.7178	1	0	0	0	0	0	3	2	0	0	0	0	1	0	3	0	60	3	0	0	0	3	0	1	140	64	5h40'	0	1	0	0	0	0	0	0	0	0	0	0	0	0
14	2010-11-24	21829/2010	82	1	70	1.65	2.7225	25.7117	0	0	0	0	0	0	3	2	1	0	0	0	0	1	3	1	55	2	0	0	0	2	0	1	60	30	3h	1	0	0	0	0	0	0	0	0	0	0	0	0	0
15	2010-10-13	19337/2010	80	1	72	1.6	2.56	28.125	1	1	0	0	0	0	3	2	1	0	0	0	1	0	3	1	50	2	0	0	0	2	0	1	65	28	4h40'	1	0	0	0	0	0	0	0	0	0	0	0	0	0
16	2010-10-12	18428/2010	81	1	83	1.68	2.8224	29.4076	1	1	0	0	0	0	1	1	1	0	1	1	0	1	2	0	30	2	0	0	0	2	0	1	57	24	2h45'	0	1	0	0	0	0	1	0	0	0	0	0	1	0
17	2010-09-21	17730/2010	83	1	63	1.68	2.8224	22.3214	0	0	0	0	0	0	1	3	0	0	0	0	1	0	1	1	60	2	1	0	0	1	0	1	70	27	5h	1	0	0	0	0	0	0	0	0	0	0	0	0	0
18	2010-09-10	17123/2010	84	1	68	1.68	2.8224	24.093	1	0	0	0	0	0	3	2	1	1	0	0	1	0	2	1	50	2	0	0	0	2	0	1	75	25	3h30'	1	0	0	0	0	0	0	0	0	0	0	0	0	0
19	2010-09-09	16881/2010	82	0	68	1.56	2.4336	27.9421	1	0	1	0	0	0	2	2	1	1	0	0	0	1	2	0	55	1	0	0	0	1	0	1	30	22	2h50'	1	0	0	0	0	0	0	0	0	0	0	0	0	1
20	2010-08-17	15394/2010	80	1	74	1.76	3.0976	23.8895	1	0	0	0	0	1	2	2	1	0	0	1	0	1	0	1	50	1	1	0	0	0	1	0	0	0	3h30'	1	0	0	0	0	0	0	0	0	0	0	0	0	0
21	2010-03-29	6686/2010	83	1	70	1.7	2.89	24.2215	1	1	1	0	0	0	4	2	1	1	0	0	1	0	3	1	50	1	0	0	0	1	0	1	30	16	3h45'	1	0	0	0	0	0	0	0	0	0	0	0	0	0
22	2010-04-23	5890/2010	83	0	70	1.55	2.4025	29.1363	1	1	0	0	0	0	3	2	0	0	0	0	1	0	3	1	60	3	1	0	0	2	0	1	90	60	6h30'	1	0	0	0	0	0	0	0	0	0	0	0	0	0
23	2010-03-19	5365/2010	80	0	86	1.58	2.4964	34.4496	1	1	0	0	0	0	4	2	0	0	1	0	0	1	3	1	50	3	0	0	0	3	1	1	65	40	4h15'	1	0	0	0	0	0	0	0	0	0	0	0	0	0
24	2010-03-13	4988/2010	81	0	60	1.5	2.25	26.6667	1	0	0	0	0	0	3	2	1	0	0	0	1	0	2	0	30	1	1	0	0	0	0	1	120	20	4h	0	1	0	0	0	0	0	0	0	1	0	0	0	0
25	2010-03-08	4611/2010	80	1	59	1.55	2.4025	24.5578	1	0	1	0	0	0	3	4	1	1	0	0	1	0	3	1	68	3	1	0	0	2	0	1	60	28	3h50'	1	0	0	0	0	0	0	0	0	0	0	0	0	0
26	2010-03-04	4179/2010	87	1	75	1.69	2.8561	26.2596	0	0	1	0	0	0	3	2	0	0	1	0	1	0	3	1	50	2	0	0	0	2	0	1	60	27	3h10'	1	0	0	0	0	0	0	0	0	0	0	0	0	0
27	2010-02-25	3716/2010	81	1	80	1.6	2.56	31.25	1	0	0	0	0	0	3	2	0	0	0	0	0	1	2	0	60	2	0	0	0	2	0	1	60	30	4h	1	0	0	0	0	0	0	0	0	0	0	0	0	0
28	2010-02-19	3542/2010	82	1	101	1.66	2.7556	36.6526	1	1	0	0	0	0	3	4	3	0	0	0	1	0	3	1	25	4	0	0	0	4	0	1	141	54	4h30'	1	0	0	0	0	0	0	0	0	0	0	0	0	0
29	2010-02-17	3120/2010	87	1	76	1.64	2.6896	28.257	1	0	0	0	0	1	3	4	1	1	1	0	1	0	3	1	45	3	0	0	0	3	0	1	70	42	4h10'	1	0	0	0	0	0	0	0	0	0	0	0	0	0
30	2010-02-10	2979/2010	83	0	67	1.67	2.7889	24.0238	1	1	1	1	1	1	2	3	1	0	0	0	0	1	2	0	56	3	0	0	0	3	0	1	100	52	5h	1	0	0	0	0	0	0	0	0	0	0	0	0	0
31	2010-02-03	2108/2010	87	0	73	1.56	2.4336	29.9967	1	0	0	0	0	0	4	2	1	0	1	0	0	1	3	0	50	3	1	0	0	2	0	1	77	47	4h55'	1	0	0	0	0	0	0	0	0	0	0	0	0	0
32	2010-01-30	1897/2010	80	0	60	1.54	2.3716	25.2994	1	0	0	0	0	0	4	3	1	0	1	0	1	0	3	0	35	2	0	0	0	2	0	1	90	30	3h25'	1	0	0	0	0	0	0	0	0	0	0	0	0	0
33	2010-01-29	1891/2010	81	1	75	1.8	3.24	23.1481	1	0	0	0	0	0	3	2	3	1	0	0	1	0	3	1	40	3	0	0	0	3	0	1	45	23	2h	1	0	0	0	0	0	0	0	0	0	0	0	0	0
34	2010-01-11	487/2010	82	0	74	1.67	2.7889	26.5338	1	0	0	0	0	1	3	3	1	0	0	0	0	1	3	0	35	4	0	0	0	4	0	1	132	78	4h30'	1	0	0	0	0	0	0	0	0	0	0	0	0	0
35	2010-07-27	14103/2010	80	1	84	1.71	2.9241	28.7268	1	0	0	0	0	0	2	2	0	1	0	0	0	1	3	0	50	2	1	0	0	1	0	1	60	30	3h50'	1	0	0	0	0	0	0	0	0	0	0	0	0	0
36	2010-07-27	14416/2010	81	0	52	1.52	2.3104	22.5069	1	0	1	0	0	1	2	3	3	0	0	0	1	0	3	0	50	3	0	0	0	3	0	1	155	46	5h30'	0	1	1	0	1	0	0	0	0	0	0	0	0	0
37	2010-07-26	14262/2010	86	1	90	1.75	3.0625	29.3878	1	0	1	0	0	0	3	2	0	0	0	0	1	0	3	1	58	2	1	0	0	1	0	1	60	20	4h10'	1	0	0	0	0	0	0	0	0	0	0	0	0	0
38	2010-07-23	14114/2010	81	1	60	1.6	2.56	23.4375	1	0	0	0	0	0	2	2	1	0	0	0	1	0	3	1	55	2	0	0	0	2	0	1	55	18	3h45'	1	0	0	0	0	0	0	0	0	0	0	0	0	0
39	2010-07-23	13743/2010	82	1	74	1.7	2.89	25.6055	1	1	1	0	0	0	3	2	1	1	0	0	1	0	3	1	35	2	0	0	0	2	0	1	50	26	4h	1	0	0	0	0	0	0	0	0	0	0	0	0	0
40	2010-07-19	13824/2010	81	1	68	1.66	2.7556	24.677	1	0	0	0	0	0	3	2	2	0	1	0	1	0	1	1	60	2	1	0	0	1	0	1	68	40	4h30'	1	0	0	0	0	0	0	0	0	0	0	0	0	0
41	2010-07-13	13465/2010	86	1	65	1.56	2.4336	26.7094	1	0	1	0	0	0	3	4	1	0	1	1	1	0	3	1	25	2	0	0	0	2	0	1	290	38	7h	0	1	0	0	0	0	0	0	0	1	0	0	1	0
42	2010-06-20	11895/2010	83	1	102	1.76	3.0976	32.9287	1	0	0	0	0	0	3	3	1	0	0	0	1	0	3	1	46	3	0	0	0	3	0	1	105	45	4h40'	1	0	0	0	0	0	0	0	0	0	0	0	0	0
43	2010-06-14	10969/2010	87	1	73	1.59	2.5281	28.8754	1	0	1	0	0	0	2	3	1	0	0	0	0	1	3	0	45	1	1	0	0	0	1	0	0	0	3h	1	0	0	0	0	0	0	0	0	0	0	0	0	1
44	2010-06-11	11325/2010	80	0	72	1.42	2.0164	35.7072	1	0	1	0	0	0	3	2	1	1	0	0	1	0	0	1	45	2	0	0	0	2	0	1	55	30	3h45'	1	0	0	0	0	0	0	0	0	0	0	0	0	0
45	2011-04-16	2174/2011	80	1	85	1.65	2.7225	31.2213	1	0	0	0	0	0	2	4	0	0	0	0	0	1	2	1	60	2	0	0	0	2	0	1	76	31	2h30'	1	0	0	0	0	0	0	0	0	0	0	0	0	0
46	2011-04-07	7377/2011	80	1	75	1.61	2.5921	28.9341	0	0	0	0	0	0	2	2	1	0	0	0	0	1	3	1	40	3	0	0	0	3	0	1	122	44	4h20'	1	0	0	0	0	0	0	0	0	0	0	0	0	0
47	2011-04-07	7277/2011	81	0	55	1.8	3.24	16.9753	1	1	0	1	0	0	3	2	1	1	1	0	0	1	3	0	40	1	1	0	0	0	1	0	0	0	3h10'	0	1	0	0	0	0	1	0	0	0	0	0	0	2
48	2011-04-05	2093/2011	80	0	75	1.54	2.3716	31.6242	1	1	1	0	0	0	4	3	3	0	0	0	0	1	1	0	64	1	1	0	0	0	0	1	68	22	4h20'	0	1	0	0	0	0	0	0	0	0	0	1	1	0
49	2011-04-04	7025/2011	82	0	70	1.54	2.3716	29.5159	1	1	0	0	1	0	3	2	0	0	0	0	0	1	3	1	50	2	0	0	0	2	0	1	58	27	3h30'	1	0	0	0	0	0	0	0	0	0	0	0	0	0
50	2011-04-01	6971/2011	82	1	80	1.6	2.56	31.25	1	1	0	0	1	0	3	2	2	0	0	0	1	0	3	1	30	3	0	0	0	3	0	1	123	53	3h40'	1	0	0	0	0	0	0	0	0	0	0	0	0	0
51	2011-03-28	6439/2011	82	0	71	1.59	2.5281	28.0843	1	0	1	0	0	0	2	2	1	0	0	0	0	1	3	0	30	2	0	0	0	2	0	1	65	30	3h50'	1	0	0	0	0	0	0	0	0	0	0	0	0	0
52	2011-03-26	6427/2011	83	0	80	1.6	2.56	31.25	1	0	0	0	0	0	3	2	1	0	0	0	1	0	2	1	50	4	0	0	0	4	0	1	117	55	4h45'	1	0	0	0	0	0	0	0	0	0	0	0	0	0
53	2011-03-24	6256/2011	85	1	70	1.7	2.89	24.2215	0	0	0	0	0	0	3	1	1	0	0	0	0	1	3	1	45	4	1	0	0	3	0	1	122	47	4h20'	1	0	0	0	0	0	0	0	0	0	0	0	0	0
54	2011-03-12	5226/2011	83	1	70	1.6	2.56	27.3437	1	1	1	0	0	1	4	2	1	0	1	0	1	0	3	1	55	2	0	0	0	2	1	0	0	0	4h30'	1	0	0	0	0	0	0	0	0	0	0	0	0	0
55	2011-03-10	2093/2011	80	0	75	1.54	2.3716	31.6242	1	1	1	0	0	0	4	3	3	0	0	0	0	1	1	0	64	1	1	0	0	0	0	1	68	22	4h20'	0	1	0	0	0	0	0	0	0	0	0	1	1	0
56	2011-02-25	3981/2011	80	1	80	1.65	2.7225	29.3848	1	1	0	0	0	0	2	2	2	0	1	0	0	1	2	1	47	3	0	0	0	3	0	1	135	48	5h10'	1	0	0	0	0	0	0	0	0	0	0	0	0	0
57	2011-02-19	3636/2011	86	0	70	1.58	2.4964	28.0404	1	0	1	0	0	0	3	2	1	0	0	1	0	1	3	1	65	2	0	0	0	2	0	1	186	88	6g10'	0	1	1	0	0	0	0	0	0	0	0	0	0	0
58	2011-02-16	3237/2011	83	0	68	1.5	2.25	30.2222	1	0	1	0	0	0	3	2	1	0	0	0	0	1	3	1	55	4	0	0	0	4	0	1	150	68	4h40'	1	0	0	0	0	0	0	0	0	0	0	0	0	0
59	2011-02-09	2707/2011	80	0	85	1.62	2.6244	32.3884	1	0	0	0	0	0	4	2	0	0	0	0	0	1	3	1	55	3	0	0	0	3	0	1	110	40	4h10'	1	0	0	0	0	0	0	0	0	0	0	0	0	0
60	2011-02-01	2538/2011	86	0	80	1.54	2.3716	33.7325	1	0	0	0	0	0	3	2	1	0	0	0	0	1	2	1	50	2	0	0	0	2	0	1	67	29	4h	1	0	0	0	0	0	0	0	0	0	0	0	0	0
61	2011-02-04	2544/2011	86	1	76	1.62	2.6244	28.959	0	0	0	0	0	0	3	2	0	0	0	1	1	0	2	0	25	3	0	0	0	3	0	1	123	59	5h30'	0	1	0	0	0	0	0	0	0	0	0	1	0	0
62	2011-01-31	2217/2011	80	0	51	1.55	2.4025	21.2279	0	0	0	0	0	0	2	3	0	0	0	0	1	0	2	1	50	1	0	0	0	1	0	1	62	34	3h15'	1	0	0	0	0	0	0	0	0	0	0	0	0	0
63	2011-01-28	2000/2011	86	1	65	1.7	2.89	22.4913	1	0	0	0	0	0	3	2	2	1	1	0	0	1	2	1	40	2	0	0	0	2	0	1	65	30	3h	1	0	0	0	0	0	0	0	0	0	0	0	0	0
64	2011-01-18	1130/2011	82	1	79	1.7	2.89	27.3356	1	0	0	0	0	0	3	2	0	0	0	0	1	0	2	0	50	2	0	0	0	2	0	1	63	31	3h20'	1	0	0	0	0	0	0	0	0	0	0	0	0	1
65	2011-01-18	994/2011	83	1	65	1.7	2.89	22.4913	1	0	0	0	1	1	3	2	0	0	0	0	0	1	0	1	70	2	0	0	0	2	0	1	67	30	3h40'	1	0	0	0	0	0	0	0	0	0	0	0	1	1
66	2011-01-10	121/2011	80	0	79	1.55	2.4025	32.8824	1	0	0	0	0	0	4	2	0	0	0	0	0	1	2	1	65	2	1	0	0	1	0	1	60	42	4h30'	1	0	0	0	0	0	0	0	0	0	0	0	0	0
67	2011-01-07	350/2011	84	0	65	1.56	2.4336	26.7094	1	0	0	0	0	0	3	2	2	0	0	0	0	1	3	1	35	2	0	0	0	2	0	1	70	26	3h15'	1	0	0	0	0	0	0	0	0	0	0	0	0	0
68	2011-07-05	13847/2011	81	1	71	1.47	2.1609	32.8567	1	1	1	0	0	0	2	3	1	0	1	0	0	1	3	1	43	2	0	0	0	2	0	1	60	30	4h	0	1	0	0	1	0	0	0	0	0	0	0	1	0
69	2011-07-06	13992/2011	83	0	65	1.61	2.5921	25.0762	1	0	1	0	0	0	3	2	2	0	0	0	1	0	1	0	35	2	0	0	0	2	0	1	84	42	3h	1	0	0	0	0	0	0	0	0	0	0	0	0	0
70	2011-07-18	14671/2011	85	0	52	1.5	2.25	23.1111	1	0	0	1	0	0	1	1	0	0	0	0	0	1	1	0	50	1	0	0	0	1	0	1	145	91	3h55'	0	1	0	0	0	0	0	0	0	0	0	1	0	0
71	2011-07-24	15246/2011	82	1	70	1.7	2.89	24.2215	1	0	1	0	0	0	3	3	0	1	0	0	1	0	3	1	55	2	0	0	0	2	0	1	90	37	3h	1	0	0	0	0	0	0	0	0	0	0	0	0	0
72	2011-08-10	16214/2011	83	1	90	1.82	3.3124	27.1706	1	0	0	0	0	0	2	2	2	0	0	0	0	1	3	1	35	3	1	0	0	2	0	1	75	30	3h40'	0	1	0	0	0	0	0	0	0	0	0	0	0	1
73	2011-08-12	16347/2011	87	1	71	1.68	2.8224	25.1559	1	0	1	0	0	0	3	2	2	0	0	0	0	1	3	0	55	1	1	0	0	0	1	0	0	0	3h11'	1	0	0	0	0	0	0	0	0	0	0	0	0	0
74	2011-09-05	17365/2011	88	0	74	1.65	2.7225	27.1809	1	1	0	0	0	0	4	2	3	3	0	1	0	1	1	1	55	3	1	0	0	2	0	1	93	59	3h10'	1	0	0	0	0	0	0	0	0	0	0	0	0	0
75	2011-09-06	18168/2011	80	1	85	1.73	2.9929	28.4005	1	1	0	0	0	0	1	1	0	0	0	0	0	1	1	1	53	2	0	0	0	2	0	1	39	19	2h45'	1	0	0	0	0	0	0	0	0	0	0	0	0	0
76	2011-09-08	18106/2011	83	0	80	1.58	2.4964	32.0461	1	1	0	0	0	1	3	3	0	0	0	0	0	1	3	0	50	1	0	0	0	1	0	1	167	110	3h45'	1	0	0	0	0	0	0	0	0	0	0	0	0	0
77	2011-09-16	18986/2011	80	1	84	1.74	3.0276	27.7447	1	1	0	0	0	0	4	3	1	0	0	0	1	0	3	1	32	4	0	0	0	4	0	1	130	65	4h	0	1	0	0	0	0	0	0	0	0	0	0	1	0
78	2011-09-19	18959/2011	80	1	73	1.66	2.7556	26.4915	1	1	0	0	0	0	1	3	2	0	0	1	0	1	2	1	18	2	0	0	0	2	0	1	77	31	2h30'	0	1	0	0	0	0	0	0	0	0	0	0	0	0
79	2011-09-26	19142/2011	80	1	75	1.74	3.0276	24.7721	1	1	1	0	0	0	3	1	1	0	0	0	1	0	3	1	58	2	1	0	0	1	0	1	84	36	3h15'	1	0	0	0	0	0	0	0	0	0	0	0	0	0
80	2011-10-03	19716/2011	81	0	78	1.6	2.56	30.4687	1	1	0	0	0	0	3	2	0	3	0	0	0	1	3	0	50	3	0	0	0	3	0	1	110	49	4h10'	1	0	0	0	0	0	0	0	0	0	0	0	0	0
81	2011-10-07	20294/2011	81	1	67	1.62	2.6244	25.5296	1	1	0	0	0	1	3	2	0	0	0	0	0	1	3	0	60	3	0	0	0	3	0	1	60	46	3h	0	1	1	0	0	0	0	0	0	0	0	0	0	0
82	2011-10-12	20664/2011	80	1	60	1.66	2.7556	21.7738	1	0	0	0	0	0	1	2	0	0	0	0	1	0	3	0	50	2	0	0	0	2	0	1	73	28	3h	1	0	0	0	0	0	0	0	0	0	0	0	0	0
83	2011-10-12	20651/2011	86	0	75	1.75	3.0625	24.4898	1	1	0	1	0	0	1	3	1	0	1	0	1	0	2	0	30	1	0	0	0	1	0	1	40	17	2h55'	1	0	0	0	0	0	0	0	0	0	0	0	0	0
84	2011-10-17	20934/2011	81	0	72	1.5	2.25	32	1	0	0	0	0	0	2	3	1	1	0	0	0	1	1	0	45	1	1	0	0	0	0	1	47	22	1h47'	1	0	0	0	0	0	0	0	0	0	0	0	0	0
85	2011-10-20	21233/2011	82	1	67	1.65	2.7225	24.6097	1	0	0	0	0	0	2	1	0	0	0	0	0	1	3	0	55	2	1	0	0	1	0	1	51	19	1h31'	1	0	0	0	0	0	0	0	0	0	0	0	0	0
86	2011-10-21	21347/2011	83	1	79	1.7	2.89	27.3356	1	0	0	0	0	0	1	1	1	0	0	0	0	1	3	0	40	3	1	0	0	2	0	1	93	51	3h50'	1	0	0	0	0	0	0	0	0	0	0	0	0	0
87	2011-10-25	21550/2011	84	1	70	1.67	2.7889	25.0995	1	0	1	0	0	0	2	2	0	0	0	0	0	1	3	0	70	3	0	0	0	3	0	1	105	43	3h10'	1	0	0	0	0	0	0	0	0	0	0	0	0	0
88	2011-10-28	21850/2011	82	1	67	1.65	2.7225	24.6097	0	0	0	0	0	0	3	3	1	0	0	0	1	0	1	1	40	2	0	0	0	2	0	1	40	21	2h10'	1	0	0	0	0	0	0	0	0	0	0	0	0	0
89	2011-10-29	21918/2011	88	0	56	1.51	2.2801	24.5603	1	0	0	0	0	1	1	1	1	0	0	0	0	1	3	0	60	2	0	0	0	2	0	1	88	44	2h	0	1	0	0	0	0	0	0	0	0	0	0	1	0
90	2011-11-03	22130/2011	82	0	50	1.58	2.4964	20.0288	1	0	1	0	0	0	2	2	0	0	0	0	0	1	3	1	40	2	0	0	0	2	0	1	35	21	1h35'	1	0	0	0	0	0	0	0	0	0	0	0	0	0
91	2011-11-09	22060/2011	80	0	62	1.62	2.6244	23.6244	1	1	0	0	0	0	2	2	1	0	0	0	0	1	3	1	30	2	0	0	0	2	0	1	136	81	2h	1	0	0	0	0	0	0	0	0	0	0	0	0	0
92	2011-11-13	22740/2011	82	1	90	1.79	3.2041	28.089	1	0	0	0	0	0	1	1	1	0	0	0	1	0	3	1	40	3	1	0	0	2	0	1	121	63	4h20'	0	1	0	0	0	1	0	0	0	1	0	0	1	0
93	2011-11-16	23090/2011	81	1	62	1.61	2.5921	23.9188	1	0	0	1	0	1	4	4	1	0	0	0	1	0	2	1	20	2	0	0	0	2	0	1	157	32	3h45'	1	0	0	0	0	0	0	0	0	0	0	0	0	0
94	2011-11-25	23476/2011	84	1	78	1.64	2.6896	29.0006	0	0	0	0	0	0	2	2	0	0	0	0	0	1	3	1	45	3	0	0	0	3	0	1	105	47	4h20'	1	0	0	0	0	0	0	0	0	0	0	0	0	0
95	2011-11-29	23866/2011	85	1	56	1.57	2.4649	22.719	0	0	0	0	0	0	2	2	0	0	0	0	0	1	1	0	25	2	0	0	0	2	0	1	90	60	3h30'	1	0	0	0	0	0	0	0	0	0	0	0	0	0
96	2011-11-29	23442/2011	81	1	70	144	20736	0.00337577	1	1	1	0	0	0	2	3	0	0	1	1	0	1	3	0	62	2	0	0	0	2	0	1	80	43	3h	0	1	0	0	0	0	0	0	0	0	1	0	1	0
97	2011-11-29	23758/2011	82	1	81	1.71	2.9241	27.7008	1	1	1	0	1	0	3	2	2	0	0	0	0	1	3	0	60	3	0	0	0	3	0	1	75	38	2h	1	0	0	0	0	0	0	0	0	0	0	0	0	0
98	2011-12-02	24137/2011	82	1	87	1.66	2.7556	31.5721	1	1	0	0	0	0	1	2	1	0	0	0	0	1	3	1	60	2	1	0	0	1	0	1	60	24	2h20'	1	0	0	0	0	0	0	0	0	0	0	0	0	0
99	2011-12-05	24225/2011	81	1	86	1.75	3.0625	28.0816	1	1	0	0	0	0	2	2	0	0	1	0	0	1	1	0	50	1	1	0	0	0	0	1	47	24	2h20'	0	1	1	0	0	0	0	0	0	0	0	0	0	0
100	2011-12-05	24229/2011	80	1	75	1.75	3.0625	24.4898	1	0	0	0	0	0	3	1	0	0	0	0	0	1	3	0	60	3	1	0	0	2	0	1	60	37	3h20'	1	0	0	0	0	0	0	0	0	0	0	0	0	1
101	2011-12-09	24684/2011	85	0	65	1.5	2.25	28.8889	1	0	0	0	0	0	3	3	0	0	0	0	1	0	3	1	50	3	0	0	0	3	0	1	128	44	4h10'	1	0	0	0	0	0	0	0	0	0	0	0	0	0
102	2011-12-13	23866/2011	86	1	56	1.57	2.4649	22.719	0	0	0	0	0	0	2	2	0	0	0	0	0	1	1	0	25	2	0	0	0	2	0	1	90	60	4h30'	1	0	0	0	0	0	0	0	0	0	0	0	1	0
103	2011-12-13	24770/2011	82	1	82	1.72	2.9584	27.7177	1	0	0	0	0	1	3	2	1	0	1	1	0	1	1	0	48	1	1	0	0	0	0	1	163	96	5h40'	1	0	0	0	0	0	0	0	0	0	0	0	0	0
104	2011-12-14	24855/2011	83	0	59	1.53	2.3409	25.204	1	0	0	0	0	0	3	2	0	0	0	0	0	1	2	1	55	3	0	0	0	3	0	1	60	43	4h	1	0	0	0	0	0	0	0	0	0	0	0	0	0
105	2011-12-13	24834/2011	82	0	85	1.57	2.4649	34.4842	1	1	0	0	0	0	3	3	1	0	1	0	0	1	3	0	45	2	0	0	0	2	0	1	94	49	3h25'	1	0	0	0	0	0	0	0	0	0	0	0	0	0
106	2011-12-14	24924/2011	83	1	87	1.74	3.0276	28.7356	1	1	1	0	0	0	3	2	1	0	0	0	0	1	3	0	60	3	1	0	0	2	0	1	76	32	2h10'	0	1	1	0	0	0	0	0	0	0	0	0	0	0
107	2011-12-16	24862/2011	84	1	75	1.85	3.4225	21.9138	0	0	0	1	0	0	3	3	1	0	0	0	0	1	1	0	40	1	0	0	0	1	1	0	0	0	2h25'	1	0	0	0	0	0	0	0	0	0	0	0	0	0
108	2011-12-19	24983/2011	80	0	74	1.5	2.25	32.8889	1	1	0	0	0	0	3	3	0	0	0	0	0	1	3	1	45	3	0	0	0	3	0	1	240	133	6h40'	1	0	0	0	0	0	0	0	0	0	0	0	0	0
109	2011-12-20	25329/2011	82	1	61	1.54	2.3716	25.721	1	1	0	0	0	0	3	2	2	2	0	0	0	1	3	0	45	3	0	0	0	3	0	1	145	65	2h25'	1	0	0	0	0	0	0	0	0	0	0	0	0	0
110	2011-12-21	25407/2011	82	0	72	1.5	2.25	32	1	1	0	1	0	0	4	2	1	1	1	0	0	1	3	1	40	3	0	0	0	3	0	1	120	50	2h15'	1	0	0	0	0	0	0	0	0	0	0	0	0	0
111	2011-12-29	25655/2011	80	1	71	1.7	2.89	24.5675	1	0	0	0	0	0	2	2	1	0	0	0	0	1	3	0	55	2	1	0	0	1	0	1	110	76	4h40'	1	0	0	0	0	0	0	0	0	0	0	0	0	0
112	2011-12-29	25652/2011	82	1	77	1.66	2.7556	27.9431	1	0	0	0	0	0	3	2	0	0	1	0	1	0	3	1	60	2	1	0	1	0	0	1	70	35	2h	1	0	0	0	0	0	0	0	0	0	0	0	0	1
113	2011-06-29	13388/2011	84	1	65	1.68	2.8224	23.03	1	0	0	1	0	0	4	2	2	1	0	0	0	1	1	1	45	2	0	0	0	2	0	1	58	28	3h	1	0	0	0	0	0	0	0	0	0	0	0	0	0
114	2011-06-28	13495/2011	84	1	50	1.62	2.6244	19.052	1	0	1	0	0	0	2	2	1	0	0	0	0	1	3	1	20	1	1	0	0	0	1	0	0	0	2h30'	0	1	0	0	0	0	0	0	0	0	0	0	0	1
115	2011-06-25	13212/2011	83	1	68	1.64	2.6896	25.2826	1	1	1	0	0	0	4	4	1	0	0	0	0	1	3	1	40	2	0	0	0	2	0	1	122	77	3h20'	1	0	0	0	0	0	0	0	0	0	0	0	0	0
116	2011-05-23	10621/2011	84	1	64	1.74	3.0276	21.1389	1	1	0	1	0	0	3	3	0	0	0	0	0	1	3	0	60	3	0	0	0	3	0	1	326	125	5h26'	0	1	0	0	0	0	0	0	0	0	0	1	0	0
117	2011-06-23	13119/2011	84	1	78	1.76	3.0976	25.1808	1	0	0	0	0	0	3	2	2	0	0	0	0	1	3	1	55	2	0	0	0	2	0	1	75	27	3h	1	0	0	0	0	0	0	0	0	0	0	0	0	0
118	2011-06-17	12685/2011	80	1	76	1.67	2.7889	27.2509	1	1	1	1	0	0	3	2	0	0	1	0	0	1	2	0	60	2	1	0	0	1	0	1	64	27	3h20'	1	0	0	0	0	0	0	0	0	0	0	0	0	1
119	2011-06-13	12296/2011	81	1	70	1.7	2.89	24.2215	0	0	1	0	0	0	3	3	0	0	0	0	1	0	1	1	58	1	0	0	0	1	0	1	142	96	3h35;	1	0	0	0	0	0	0	0	0	0	0	0	0	0
120	2011-06-09	12035/2011	80	1	75	1.61	2.5921	28.9341	1	1	1	0	0	0	1	3	1	1	0	0	0	1	3	0	50	4	1	0	0	3	0	1	140	75	5h20'	1	0	0	0	0	0	0	0	0	0	0	0	0	0
121	2011-06-09	12097/2011	86	1	85	1.6	2.56	33.2031	0	0	0	0	0	0	2	4	1	0	1	0	0	1	2	1	25	3	0	0	0	3	0	1	460	110	7h35'	0	1	0	0	0	0	0	0	1	1	1	0	0	0
122	2011-06-07	11907/2011	85	0	85	1.65	2.7225	31.2213	1	1	1	0	0	0	3	2	1	0	0	1	0	1	3	1	45	1	1	0	0	0	0	1	0	0	3h20'	1	0	0	0	0	0	0	0	0	0	0	0	0	0
123	2011-06-06	11776/2011	82	1	89	1.74	3.0276	29.3962	1	0	0	0	0	0	3	2	0	0	0	0	1	0	1	0	55	3	1	0	0	2	0	1	115	47	2h40'	0	1	0	0	1	0	0	0	0	0	0	0	1	0
124	2011-06-01	11583/2011	80	1	62	1.65	2.7225	22.7732	1	0	0	0	0	0	3	2	0	0	0	0	1	0	2	1	40	3	0	0	0	3	0	1	120	50	4h15'	1	0	0	0	0	0	0	0	0	0	0	0	0	1
125	2011-05-26	10742/2011	83	1	61	1.56	2.4336	25.0657	0	1	1	0	0	0	2	2	1	0	0	1	0	1	3	1	40	2	0	0	0	2	0	1	80	38	2h30'	1	0	0	0	0	0	0	0	0	0	0	0	0	0
126	2011-05-26	11108/2011	80	0	50	1.64	2.6896	18.5901	1	1	1	0	0	0	2	2	0	0	0	0	0	1	3	1	69	2	0	0	0	2	0	1	50	21	2h50'	1	0	0	0	0	0	0	0	0	0	0	0	0	0
127	2011-05-23	10646/2011	83	1	75	1.65	2.7225	27.5482	1	0	1	0	0	0	2	3	0	0	0	0	0	1	3	0	25	2	0	0	0	2	0	1	80	31	3h35'	1	0	0	0	0	0	0	0	0	0	0	0	0	0
128	2011-05-17	10128/2011	80	1	80	1.7	2.89	27.6817	1	1	0	0	0	0	2	1	2	0	0	0	0	1	3	0	18	2	1	0	0	1	0	1	96	47	2h16'	1	0	0	0	0	0	0	0	0	0	0	0	0	0
129	2011-05-13	9032/2011	81	1	74	1.74	3.0276	24.4418	1	1	0	0	0	0	1	1	1	0	0	0	0	1	3	1	50	2	0	0	0	2	0	1	45	20	3h20'	0	1	0	0	1	1	1	0	0	0	0	0	0	0
130	2011-05-12	9868/2011	80	0	58	1.53	2.3409	24.7768	1	0	1	0	0	0	3	2	1	0	0	0	1	0	3	0	30	2	1	0	0	1	0	1	64	35	3h30'	1	0	0	0	0	0	0	0	0	0	0	0	0	0
131	2011-05-11	9655/2011	80	1	94	1.74	3.0276	31.0477	0	0	1	0	0	0	3	2	1	1	0	0	0	1	3	1	75	1	1	0	0	0	1	0	0	0	3h15'	1	0	0	0	0	0	0	0	0	0	0	0	0	1
132	2011-05-05	9252/2011	81	1	88	1.7	2.89	30.4498	1	0	0	0	0	0	3	2	1	1	1	0	0	1	1	0	55	1	1	0	0	0	1	0	0	0	2h30'	1	0	0	0	0	0	0	0	0	0	0	0	0	0
133	2011-05-05	9232/2011	82	1	76	1.7	2.89	26.2976	1	0	1	0	0	0	2	2	1	1	1	1	0	1	2	0	40	3	0	0	0	3	0	1	104	52	4h30'	1	0	0	0	0	0	0	0	0	0	0	0	0	0
134	2011-04-29	9031/2011	80	1	85	1.7	2.89	29.4118	1	0	0	0	0	0	4	2	1	0	0	0	1	0	2	0	45	2	0	0	0	2	0	1	60	27	2h25'	1	0	0	0	0	0	0	0	0	0	0	0	0	0
135	2011-04-28	8742/2011	81	1	75	1.64	2.6896	27.8852	1	1	1	0	0	0	1	2	1	0	0	1	1	0	3	1	55	3	1	0	0	2	0	1	85	43	3h	1	0	0	0	0	0	0	0	0	0	0	0	0	0
136	2012-06-22	12228/2012	82	1	51	1.62	2.6244	19.433	1	0	0	0	0	0	2	2	0	0	0	0	0	1	3	0	60	1	0	0	0	1	0	1	133	85	4h45'	0	1	1	0	0	0	0	0	0	0	0	0	0	0
137	2012-06-17	11869/2012	82	0	80	1.7	2.89	27.6817	0	0	0	0	0	0	4	4	1	0	0	0	0	1	3	1	30	2	0	0	0	2	0	1	44	25	2h20'	1	0	0	0	0	0	0	0	0	0	0	0	0	0
138	2012-06-13	11584/2012	80	1	81	1.76	3.0976	26.1493	1	1	0	1	0	0	4	2	2	0	0	0	0	1	3	1	20	2	0	0	0	2	0	1	60	25	2h10'	1	0	0	0	0	0	0	0	0	0	0	0	0	1
139	2012-06-05	11072/2012	83	0	80	1.64	2.6896	29.7442	1	1	0	0	0	0	4	4	1	0	0	0	1	0	1	1	50	3	0	0	0	3	0	1	111	51	3h50'	1	0	0	0	0	0	0	0	0	0	0	0	0	0
140	2012-05-31	10551/2012	82	0	89	1.55	2.4025	37.0447	1	1	0	0	0	0	3	3	2	0	0	0	0	1	3	0	50	1	1	0	0	0	0	1	50	25	2h50'	1	0	0	0	0	0	0	0	0	0	0	0	0	0
141	2012-05-23	10151/2012	82	1	50	166	27556	0.00181449	0	0	0	0	0	0	4	2	1	2	0	0	1	0	1	1	40	2	0	0	0	2	0	1	84	24	3h	0	1	1	0	0	0	0	0	0	0	0	0	0	0
142	2012-04-25	8248/2012	82	1	72	1.62	2.6244	27.4348	1	1	0	0	0	0	2	2	0	0	0	1	0	1	2	0	45	3	1	0	0	2	0	1	286	155	9h15'	0	1	1	0	1	0	0	0	0	0	0	1	1	0
143	2012-05-17	8245/2012	81	1	75	1.82	3.3124	22.6422	0	0	0	0	0	1	3	1	1	1	0	1	0	1	3	1	45	3	1	0	0	2	0	1	101	47	4h50'	0	1	0	0	0	0	0	0	0	0	0	1	0	0
144	2012-05-17	9807/2012	83	0	70	1.5	2.25	31.1111	1	0	0	0	0	0	4	2	1	0	0	0	1	0	3	1	45	2	1	0	0	1	0	1	90	43	4h15'	0	1	0	1	0	0	0	0	0	0	0	0	0	0
145	2012-05-14	8989/2012	80	1	62	1.59	2.5281	24.5243	1	1	0	1	0	0	2	2	1	0	0	0	0	1	2	0	24	2	0	0	0	0	0	1	210	108	7h25'	0	1	1	0	0	0	0	0	0	0	0	0	1	0
146	2012-05-08	8245/2012	81	1	75	1.82	3.3124	22.6422	0	0	0	0	0	1	3	1	1	1	0	1	0	1	3	1	45	3	1	0	0	2	0	1	101	47	4h50'	0	1	0	0	0	0	0	0	0	0	0	1	0	0
147	2012-05-02	8345/2012	80	1	71	1.73	2.9929	23.7228	0	0	0	0	0	0	2	2	0	0	0	1	0	1	3	0	35	3	1	0	0	2	0	1	185	123	3h55'	1	0	0	0	0	0	0	0	0	0	0	0	0	0
148	2012-05-02	8732/2012	84	0	71	1.65	2.7225	26.079	1	1	0	0	0	0	4	2	1	1	1	0	1	0	3	1	40	1	1	0	0	0	0	1	48	32	3h10'	1	0	0	0	0	0	0	0	0	0	0	0	0	0
149	2012-04-27	8157/2012	82	0	70	1.47	2.1609	32.3939	1	0	0	0	0	0	3	2	0	0	1	0	0	1	3	1	70	2	0	0	0	2	0	1	56	40	1h31'	1	0	0	0	0	0	0	0	0	0	0	0	0	0
150	2012-04-25	8330/2012	81	1	76	1.65	2.7225	27.9155	1	0	0	0	0	0	3	2	0	0	0	1	0	1	3	0	50	3	1	0	0	2	0	1	75	45	4h	0	1	0	0	0	0	1	0	0	0	0	0	0	0
151	2012-04-18	7705/2012	85	1	74	1.75	3.0625	24.1633	1	0	0	0	0	0	1	2	0	0	0	0	0	1	3	1	42	1	1	0	0	0	1	0	0	0	4h50'	0	1	0	0	0	0	0	0	1	0	1	0	0	0
152	2012-04-13	7249/2012	80	1	77	1.72	2.9584	26.0276	1	0	0	0	0	0	2	2	1	0	0	0	0	1	3	0	30	2	1	0	0	0	0	1	50	25	2h50'	1	0	0	0	0	0	0	0	0	0	0	0	0	0
153	2012-04-13	7518/2012	80	0	68	1.57	2.4649	27.5873	0	0	0	0	0	0	4	4	1	0	0	0	1	0	3	1	75	2	0	0	0	2	0	1	98	38	2h28'	1	0	0	0	0	0	0	0	0	0	0	0	0	0
154	2012-04-11	7177/2012	82	1	70	1.64	2.6896	26.0262	1	0	0	0	0	0	3	1	0	0	0	0	0	1	1	0	56	1	0	0	0	1	0	1	102	72	5h	1	0	0	0	0	0	0	0	0	0	0	0	0	0
155	2012-04-02	6155/2012	84	1	78	1.6	2.56	30.4687	1	1	0	0	0	0	4	2	2	2	0	0	0	1	2	1	35	3	0	0	0	3	0	1	99	87	3h	1	0	0	0	0	0	0	0	0	0	0	0	0	0
156	2012-03-29	6395/2012	80	0	68	1.54	2.3716	28.6726	0	0	0	0	0	0	3	2	0	0	0	0	0	1	3	1	50	2	0	0	0	2	0	1	50	24	1h35'	1	0	0	0	0	0	0	0	0	0	0	0	0	0
157	2012-03-29	6609/2012	82	1	74	1.7	2.89	25.6055	1	0	0	0	0	0	2	3	1	0	0	0	0	1	3	1	35	3	1	0	0	2	0	1	90	49	3h30'	1	0	0	0	0	0	0	0	0	0	0	0	0	0
158	2012-03-23	6116/2012	83	1	68	1.58	2.4964	27.2392	1	1	0	0	0	0	4	2	1	1	1	0	0	1	3	1	40	3	0	0	0	3	0	1	103	41	3h	0	1	0	0	0	0	0	0	0	0	0	1	0	0
159	2012-03-20	5643/2012	80	1	74	1.62	2.6244	28.1969	1	0	0	0	0	0	2	1	2	0	0	1	0	1	3	0	55	3	1	0	0	2	0	1	85	45	3h10'	1	0	0	0	0	0	0	0	0	0	0	0	0	0
160	2012-03-16	5209/2012	80	1	69	1.68	2.8224	24.4473	1	0	1	0	0	0	3	2	0	0	0	0	0	1	1	1	65	3	1	0	0	2	0	1	104	54	3h10'	1	0	0	0	0	0	0	0	0	0	0	0	0	0
161	2012-03-15	5438/2012	80	1	61	1.63	2.6569	22.9591	1	0	0	0	0	0	3	2	1	0	0	0	0	1	2	1	35	2	0	0	0	2	0	1	40	25	4h	0	1	0	0	1	0	0	0	0	0	0	0	0	0
162	2012-03-14	5302/2012	80	1	67	1.6	2.56	26.1719	1	0	0	0	0	0	2	3	1	0	0	0	0	1	1	0	45	1	0	0	0	1	0	1	150	93	4h55'	0	1	0	0	1	0	0	0	0	0	0	0	0	0
163	2012-03-13	5069/2012	80	0	50	1.41	1.9881	25.1496	1	0	0	0	0	0	1	1	0	0	0	0	0	1	3	0	75	2	0	0	0	2	0	1	142	81	5h20'	1	0	0	0	0	0	0	0	0	0	0	0	0	0
164	2012-03-12	5042/2012	80	1	78	1.65	2.7225	28.6501	1	0	0	0	0	0	3	2	0	0	0	0	0	1	3	1	50	4	0	0	0	4	0	1	120	60	3h45'	1	0	0	0	0	0	0	0	0	0	0	0	0	0
165	2012-03-12	5047/2012	83	1	89	1.68	2.8224	31.5334	1	1	0	0	0	0	3	1	1	0	1	0	0	1	3	0	55	2	0	0	0	2	0	1	55	27	2h30'	1	0	0	0	0	0	0	0	0	0	0	0	0	1
166	2012-03-08	4782/2012	82	0	78	1.6	2.56	30.4687	1	0	0	0	0	0	2	2	1	0	0	1	0	1	1	0	75	1	1	0	0	0	1	0	0	0	1g45'	1	0	0	0	0	0	0	0	0	0	0	0	0	1
167	2012-03-08	4756/2012	86	0	75	1.48	2.1904	34.2403	1	0	0	0	0	0	3	1	1	1	0	1	0	1	3	0	40	2	1	0	0	1	0	1	95	46	2g35'	1	0	0	0	0	0	0	0	0	0	0	0	0	0
168	2012-03-05	4545/2012	81	1	73	1.69	2.8561	25.5593	1	0	0	0	0	0	3	2	0	0	0	0	0	1	1	0	70	1	0	0	0	1	0	1	90	57	3g20'	1	0	0	0	0	0	0	0	0	0	0	0	0	0
169	2012-03-02	4277/2012	81	1	88	1.75	3.0625	28.7347	1	1	0	0	0	0	2	1	1	0	0	0	0	1	3	0	65	3	1	0	0	2	0	1	120	46	4h20'	1	0	0	0	0	0	0	0	0	0	0	0	0	0
170	2012-02-25	3910/2012	80	0	54	1.49	2.2201	24.3232	1	0	0	0	0	0	4	2	1	0	1	0	0	1	2	0	60	2	0	0	0	2	0	1	181	103	4h19'	1	0	0	0	0	0	0	0	0	0	0	0	0	0
171	2012-02-22	3545/2012	81	0	91	1.62	2.6244	34.6746	1	0	1	0	0	0	2	2	2	2	0	0	0	1	3	0	65	2	0	0	0	2	0	1	65	31	2h45'	1	0	0	0	0	0	0	0	0	0	0	0	0	0
172	2012-02-16	3342/2012	80	0	75	1.54	2.3716	31.6242	0	0	0	0	0	0	2	1	0	0	0	1	0	1	1	0	73	2	1	0	0	1	0	1	96	56	3h50'	1	0	0	0	0	0	0	0	0	0	0	0	0	0
173	2012-02-06	2522/2012	84	0	67	1.52	2.3104	28.9993	1	0	1	0	0	0	3	2	0	0	0	0	0	1	1	1	70	2	0	0	0	2	0	1	64	34	2h55'	1	0	0	0	0	0	0	0	0	0	0	0	0	0
174	2012-02-06	2530/2012	80	1	92	1.87	3.4969	26.309	1	0	0	0	0	0	3	2	1	0	0	0	0	1	3	1	60	2	0	0	0	2	0	1	50	24	1h55'	1	0	0	0	0	0	0	0	0	0	0	0	0	0
175	2012-01-25	1736/2012	84	1	62	1.68	2.8224	21.9671	1	0	0	0	0	0	3	3	0	0	0	0	0	1	1	0	65	1	1	0	0	0	0	1	155	98	4h30'	0	1	1	0	0	0	0	0	0	0	0	0	0	0
176	2012-01-16	584/2012	82	0	82	1.52	2.3104	35.4917	1	1	0	0	0	0	4	1	2	1	0	1	1	0	3	0	45	2	0	0	0	2	0	1	67	28	3h50'	1	0	0	0	0	0	0	0	0	0	0	0	0	0
177	2012-01-10	589/2012	80	0	90	1.6	2.56	35.1562	1	1	0	0	0	0	3	2	0	0	0	0	0	1	3	0	60	2	0	0	0	2	0	1	56	34	3h	1	0	0	0	0	0	0	0	0	0	0	0	0	0
178	2012-01-09	81/2012	81	1	85	1.68	2.8224	30.1162	1	1	0	0	0	0	2	2	0	0	0	0	0	1	3	0	50	2	1	0	0	1	0	1	70	37	3h10'	1	0	0	0	0	0	0	0	0	0	0	0	0	1
179	2012-01-04	212/2012	81	0	63	1.55	2.4025	26.2227	1	1	0	0	0	0	2	2	1	0	0	0	0	1	3	1	38	2	0	0	0	2	0	1	149	77	4h	1	0	0	0	0	0	0	0	0	0	0	0	0	0
180	2012-01-04	210/2012	85	1	64	1.56	2.4336	26.2985	0	0	0	0	0	1	3	2	2	1	0	0	0	1	3	1	60	2	1	0	0	1	0	1	180	86	5h20'	1	0	0	0	0	0	0	0	0	0	0	0	0	0
181	2012-01-03	135/2012	82	0	63	1.42	2.0164	31.2438	1	0	0	0	0	0	3	2	1	0	0	0	0	1	3	1	40	3	1	0	0	2	0	1	75	47	3h	1	0	0	0	0	0	0	0	0	0	0	0	0	0
182	2012-12-13	24128/2012	80	1	85	1.7	2.89	29.4118	1	1	0	0	0	0	3	2	0	2	0	0	0	1	3	0	55	3	1	0	0	2	0	1	80	40	3h40'	1	0	0	0	0	0	0	0	0	0	0	0	0	0
183	2012-12-02	23322/2012	85	1	90	1.7	2.89	31.1419	1	1	0	0	0	0	4	2	1	0	0	0	1	0	3	0	35	2	0	0	0	2	0	1	66	28	2h	1	0	0	0	0	0	0	0	0	0	0	0	0	0
184	2012-11-29	23146/2012	81	1	52	1.76	3.0976	16.7872	0	0	1	0	0	0	3	2	1	0	1	0	0	1	3	1	55	3	0	0	0	3	0	1	80	28	4h20'	0	1	0	0	1	0	0	0	0	0	0	0	0	0
185	2012-11-20	22332/2012	80	1	67	1.68	2.8224	23.7387	1	1	0	1	0	0	3	2	0	0	0	0	0	1	3	0	40	3	1	0	0	2	0	1	197	132	5h20'	1	0	0	0	0	0	0	0	0	0	0	0	0	0
186	2012-11-20	22575/2012	80	1	60	1.67	2.7889	21.5139	0	0	0	0	0	1	4	3	1	0	0	0	1	0	1	0	25	1	1	0	0	0	1	0	0	0	2h	1	0	0	0	0	0	0	0	0	0	0	0	0	0
187	2012-11-14	21995/2012	80	1	83	1.68	2.8224	29.4076	1	1	0	0	0	0	3	1	1	0	0	0	0	1	3	0	70	3	1	0	0	2	0	1	97	55	4h25'	1	0	0	0	0	0	0	0	0	0	0	0	0	1
188	2012-11-13	21887/2012	80	1	72	1.64	2.6896	26.7698	0	0	0	0	0	0	4	2	0	0	0	0	0	1	1	0	63	1	1	0	0	0	0	1	150	66	2h	1	0	0	0	0	0	0	0	0	0	0	0	0	0
189	2012-11-08	21447/2012	80	0	52	1.48	2.1904	23.74	0	0	0		0	1	1	1	0	0	1	0	0	1	2	0	55	1	0	0	0	1	0	1	107	73	3h25'	1	0	0	0	0	0	0	0	0	0	0	0	0	0
190	2012-11-07	21454/2012	80	1	82	1.75	3.0625	26.7755	1	0	0	0	0	0	1	1	1	0	0	0	0	1	3	1	40	2	1	0	0	1	0	1	85	44	3h10'	1	0	0	0	0	0	0	0	0	0	0	0	0	0
191	2012-11-05	21183/2012	82	1	59	1.66	2.7556	21.4109	1	0	0	0	0	0	1	1	1	1	0	0	1	0	2	1	55	2	1	1	0	0	0	1	120	52	4h30'	0	1	0	0	0	0	0	0	0	0	0	0	0	0
192	2012-10-30	20551/2012	86	1	72	1.7	2.89	24.9135	1	0	0	0	0	0	4	2	0	0	0	0	0	1	3	0	52	4	1	0	0	3	0	1	85	58	3h55'	1	0	0	0	0	0	0	0	0	0	0	0	0	0
193	2012-10-29	20629/2012	80	1	71	1.65	2.7225	26.079	1	1	0	0	0	0	3	2	0	0	0	0	0	1	1	0	65	1	0	0	0	1	0	1	135	105	3h30'	1	0	0	0	0	0	0	0	0	0	0	0	0	0
194	2012-10-26	20780/2012	83	1	74	1.68	2.8224	26.2188	1	0	0	0	0	0	4	3	1	0	0	0	1	0	3	1	48	2	1	1	0	0	0	1	82	42	1h22'	1	0	0	0	0	0	0	0	0	0	0	0	0	1
195	2012-10-15	19850/2012	85	0	58	1.5	2.25	25.7778	0	0	0	0	0	0	3	1	1	1	0	0	1	0	3	1	24	2	0	0	0	2	0	1	60	25	2h40'	1	0	0	0	0	0	0	0	0	0	0	0	0	0
196	2012-10-13	19806/2012	83	0	84	1.68	2.8224	29.7619	1	1	0	0	0	0	3	2	1	3	1	1	1	0	3	0	48	3	1	0	0	2	0	1	130	62	4h25'	1	0	0	0	0	0	0	0	0	0	0	0	0	0
197	2012-10-08	19270/2012	82	1	90	1.75	3.0625	29.3878	1	1	0	0	0	0	3	3	0	0	0	0	0	1	3	1	45	2	1	0	0	1	0	1	65	34	5h	1	0	0	0	0	0	0	0	0	0	0	0	0	0
198	2012-09-11	17497/2012	88	1	73	1.73	2.9929	24.3911	1	1	0	0	0	0	3	1	2	0	1	1	0	1	3	1	58	1	0	0	0	1	0	1	40	15	4h30'	1	0	0	0	0	0	0	0	0	0	0	0	0	0
199	2012-09-03	16938/2012	82	0	94	1.64	2.6896	34.9494	1	1	0	0	0	0	2	1	1	0	0	0	0	1	3	0	50	3	1	0	0	2	0	1	118	51	3h35'	1	0	0	0	0	0	0	0	0	0	0	0	0	0
200	2012-08-29	16669/2012	81	1	70	1.65	2.7225	25.7117	0	0	0	0	0	0	3	2	1	0	0	0	0	1	3	1	45	1	1	0	0	0	1	0	0	0	1h20'	1	0	0	0	0	0	0	0	0	0	0	0	0	1
201	2012-08-21	16106/2012	82	0	71	1.58	2.4964	28.441	1	0	1	0	0	0	2	1	1	0	0	0	0	1	3	0	40	2	0	0	0	2	0	1	91	22	3h45'	1	0	0	0	0	0	0	0	0	0	0	0	0	0
202	2012-08-14	15748/2012	83	1	100	1.8	3.24	30.8642	1	0	0	1	0	0	0	2	1	0	0	0	1	0	2	1	45	2	0	0	0	2	0	1	80	28	4h15'	1	0	0	0	0	0	0	0	0	0	0	0	0	0
203	2012-08-08	15311/2012	88	1	84	1.69	2.8561	29.4107	0	0	0	0	0	0	1	2	2	2	1	0	0	1	3	1	50	2	0	0	0	2	0	1	77	40	2h40'	1	0	0	0	0	0	0	0	0	0	0	0	0	0
204	2012-08-07	15132/2012	81	0	72	1.64	2.6896	26.7698	1	1	0	0	0	0	3	1	1	0	0	0	0	1	1	0	38	1	0	0	0	1	0	1	95	60	2h35'	1	0	0	0	0	0	0	0	0	0	0	0	0	0
205	2012-07-31	14864/2012	82	0	54	1.48	2.1904	24.653	1	1	0	0	0	0	3	2	1	0	0	0	0	1	3	1	60	3	0	0	0	3	0	1	100	33	3h10'	1	0	0	0	0	0	0	0	0	0	0	0	0	1
206	2012-07-19	14103/2012	84	1	71	1.67	2.7889	25.4581	1	0	0	0	0	0	3	1	0	0	0	0	0	1	3	1	60	2	0	0	0	2	0	1	140	90	4h5'	1	0	0	0	0	0	0	0	0	0	0	0	0	0
207	2012-07-18	13706/2012	81	1	84	1.76	3.0976	27.1178	1	0	0	0	0	0	3	1	1	0	0	1	1	0	3	0	60	2	1	0	0	1	0	1	57	26	1h30'	1	0	0	0	0	0	0	0	0	0	0	0	0	0
208	2012-07-17	13914/2012	88	1	72	1.62	2.6244	27.4348	1	0	0	0	0	0	3	3	1	0	0	0	0	1	3	1	70	3	0	0	0	3	0	1	82	36	3h	1	0	0	0	0	0	0	0	0	0	0	0	0	0
209	2012-07-11	13580/2012	80	1	68	1.64	2.6896	25.2826	0	0	0	0	0	0	4	4	1	1	0	0	1	0	1	0	55	1	0	0	0	1	0	1	205	136	4h50'	0	1	0	0	0	0	0	0	0	0	0	0	1	0
210	2012-07-09	12913/2012	81	0	70	1.69	2.8561	24.5089	0	0	0	0	0	0	3	3	1	0	0	0	1	0	3	0	60	2	0	0	0	2	0	1	180	114	6h15'	1	0	0	0	0	0	0	0	0	0	0	0	0	0
211	2013-01-04	3/2013	80	1	67	1.74	3.0276	22.1297	1	0	0	0	0	0	3	2	2	0	0	1	0	1	3	0	64	3	0	0	0	3	0	1	62	37	3h55'	1	0	0	0	0	0	0	0	0	0	0	0	0	0
212	2013-01-08	332/2013	81	1	80	1.81	3.2761	24.4193	1	1	0	0	0	0	3	2	0	0	0	1	0	1	1	0	50	3	1	0	0	2	0	1	108	71	4h	0	1	0	0	0	0	0	0	0	0	0	1	0	0
213	2013-01-11/12	791/2013	83	0	62	1.64	2.6896	23.0518	1	1	0	0	0	0	3	2	2	0	0	0	0	1	3	0	50	3	0	0	0	3	0	1	96	66	4h50'	1	0	0	0	0	0	0	0	0	0	0	0	0	0
214	2013-01-15	881/2013	82	1	86	1.74	3.0276	28.4053	1	1	0	1	0	0	3	2	0	0	0	0	0	1	2	0	65	2	0	0	0	2	0	1	140	90	5h30'	1	0	0	0	0	0	0	0	0	0	0	0	0	0
215	2013-01-24	1564/2013	80	1	76	1.71	2.9241	25.9909	1	1	0	0	0	1	2	2	0	0	0	0	0	1	2	0	60	2	1	0	0	1	0	1	105	60	4h10'	1	0	0	0	0	0	0	0	0	0	0	0	0	1
216	2013-02-25	3914/2013	85	1	90	1.75	3.0625	29.3878	1	0	0	0	0	0	2	1	0	0	0	0	0	1	1	1	50	2	0	0	0	2	0	1	132	68	3h20'	1	0	0	0	0	0	0	0	0	0	0	0	0	1
217	2013-03-05	4829/2013	84	1	70	1.68	2.8224	24.8016	1	0	0	0	0	0	1	2	1	0	1	0	0	1	3	0	45	2	0	0	0	2	0	1	100	40	3h15'	0	1	1	0	0	0	0	0	0	1	0	0	1	0
218	2013-03-06	4825/2013	81	1	85	1.68	2.8224	30.1162	1	1	0	0	0	0	4	1	1	0	0	1	0	1	3	0	70	2	0	0	0	2	0	1	90	50	2h30'	1	0	0	0	0	0	0	0	0	0	0	0	0	0
219	2013-03-08	5229/2013	83	1	65	1.65	2.7225	23.8751	0	0	0	0	0	0	4	2	1	1	1	0	1	0	2	1	25	2	0	0	0	2	0	1	47	21	2h	0	1	0	0	0	0	0	0	0	0	0	1	0	0
220	2013-03-21	6217/2013	80	0	68	1.58	2.4964	27.2392	1	1	0	0	0	0	2	2	1	3	0	0	0	1	3	0	55	3	0	0	0	3	0	1	90	43	3h40'	1	0	0	0	0	0	0	0	0	0	0	0	0	0
221	2013-03-22	6283/2012	83	1	86	1.68	2.8224	30.4705	1	0	0	0	0	0	3	3	0	0	0	0	0	1	2	0	65	2	0	0	0	2	0	1	96	57	2h6'	1	0	0	0	0	0	0	0	0	0	0	0	0	0
222	2013-03-22	5847/2013	82	0	83	1.55	2.4025	34.5473	1	1	0	0	0	0	4	3	3	2	1	1	0	1	2	0	30	2	0	0	0	2	0	1	123	73	4h10'	1	0	0	0	0	0	0	0	0	0	0	0	0	0
223	2013-03-28	6712/2013	80	0	70	1.56	2.4336	28.764	1	0	0	0	0	0	3	2	1	0	1	0	0	1	3	0	55	3	1	0	0	2	0	1	110	59	5h25'	1	0	0	0	0	0	0	0	0	0	0	0	0	0
224	2013-04-03	6902/2013	80	0	77	1.59	2.5281	30.4577	1	0	1	0	0	0	3	2	0	0	0	0	0	1	1	0	65	1	1	0	0	0	0	1	80	27	2h45'	1	0	0	0	0	0	0	0	0	0	0	0	0	0
225	2013-04-09	7474/2013	84	1	81	1.88	3.5344	22.9176	1	0	0	0	0	0	3	4	3	1	1	0	0	1	3	1	25	3	0	0	0	3	0	1	65	39	3h10'	1	0	0	0	0	0	0	0	0	0	0	0	0	0
226	2013-04-10	7497/2013	81	0	82	1.54	2.3716	34.5758	1	0	0	0	0	0	3	1	1	0	0	0	0	1	3	0	60	3	1	0	0	2	0	1	95	43	2h35'	1	0	0	0	0	0	0	0	0	0	0	0	0	0
227	2013-04-11	7691/2013	83	1	63	1.6	2.56	24.6094	1	0	0	0	0	0	2	2	1	0	0	0	0	1	1	0	45	1	0	0	0	1	0	1	174	115	5h	1	0	0	0	0	0	0	0	0	0	0	0	0	0
228	2013-04-12	7798/2013	84	0	68	1.5	2.25	30.2222	1	0	0	0	0	0	1	1	1	0	0	0	0	1	1	1	50	1	0	0	0	1	1	0	0	0	1h5'	1	0	0	0	0	0	0	0	0	0	0	0	0	0
229	2013-04-12	7804/2013	83	1	100	1.75	3.0625	32.6531	1	0	0	1	0	0	3	2	0	0	1	1	1	0	3	1	45	3	0	0	0	3	0	1	108	45	3h	0	1	0	0	0	0	0	0	0	0	0	1	0	0
230	2013-04-27	9034/2013	81	0	75	1.59	2.5281	29.6665	1	1	0	0	0	0	4	3	2	0	1	0	1	0	3	0	60	2	0	0	0	2	0	1	100	43	3h30'	1	0	0	0	0	0	0	0	0	0	0	0	0	0
231	2013-04-27	9017/2013	83	1	90	1.78	3.1684	28.4055	1	0	0	0	0	0	2	2	1	0	0	0	1	0	3	0	30	4	0	0	0	4	0	1	155	68	4h10'	1	0	0	0	0	0	0	0	0	0	0	0	0	0
232	2013-04-26	8897/2013	81	1	125	1.79	3.2041	39.0125	1	1	0	0	0	0	3	2	0	0	0	1	0	1	2	0	50	2	1	0	0	1	0	1	60	26	3h	1	0	0	0	0	0	0	0	0	0	0	0	0	1
233	2013-04-29	8628/2013	80	1	72	1.66	2.7556	26.1286	1	0	0	0	0	0	3	2	1	0	0	0	0	1	2	0	63	3	0	0	0	3	0	1	85	39	2h40'	1	0	0	0	0	0	0	0	0	0	0	0	0	0
234	2013-04-30	9159/2013	80	0	85	1.71	2.9241	29.0688	1	1	0	0	0	0	3	2	0	0	0	0	1	0	3	1	45	2	1	0	0	1	0	1	60	31	3h30'	0	1	0	0	0	0	0	0	0	0	0	0	0	0
235	2013-05-06	9338/2013	80	0	58	1.51	2.2801	25.4375	1	0	0	0	0	0	3	2	0	0	0	0	0	1	2	1	65	3	1	0	0	2	0	1	81	45	3h35'	1	0	0	0	0	0	0	0	0	0	0	0	0	0
236	2013-05-09	9247/2013	82	1	78	1.73	2.9929	26.0617	0	0	0	0	0	0	3	2	1	0	0	0	0	1	3	0	60	3	0	0	0	3	0	1	120	90	4h20'	1	0	0	0	0	0	0	0	0	0	0	0	0	0
237	2013-05-13	9905/2013	83	1	73	1.73	2.9929	24.3911	1	0	0	0	0	0	3	2	1	0	0	0	0	1	2	1	25	2	0	0	0	2	0	1	130	95	7h40'	0	1	0	0	1	0	0	0	0	0	0	0	0	0
238	2013-05-16	10250/2013	80	1	66	1.6	2.56	25.7812	1	0	0	0	0		3	1	0	0	0	0	0	1	3	0	50	2	1	0	0	1	0	1	92	58	4h10'	1	0	0	0	0	0	0	0	0	0	0	0	0	1
239	2013-05-23	10815/2013	83	0	88	1.55	2.4025	36.6285	1	0	0	0	0	0	2	3	0	0	1	0	0	1	3	1	70	1	1	0	0	0	0	1	146	84	4h30'	1	0	0	0	0	0	0	0	0	0	0	0	0	0
240	2013-05-24	10973/2013	84	1	75	1.7	2.89	25.9516	1	0	0	0	0	0	4	4	0	1	0	0	1	0	3	1	30	2	0	0	0	2	0	1	75	35	3h	0	1	0	0	0	1	0	0	0	0	0	0	0	0
241	2013-05-27	11083/2013	82	1	87	1.87	3.4969	24.8792	0	0	0	0	0	0	2	1	1	0	1	1	0	1	1	0	45	3	0	0	0	3	0	1	150	89	4h	1	0	0	0	0	0	0	0	0	0	0	0	0	0
242	2013-05-29	11301/2013	81	1	58	1.57	2.4649	23.5304	0	1	0	0	0	0	2	2	0	0	0	0	0	1	3	0	60	2	1	0	0	1	0	1	58	24	2h40'	1	0	0	0	0	0	0	0	0	0	0	0	0	1
243	2013-05-29	11311/2013	83	1	74	1.67	2.7889	26.5338	1	0	0	0	0	0	0	3	2	0	1	0	0	1	3	0	25	3	0	0	0	3	0	1	131	57	4h50'	1	0	0	0	0	0	0	0	0	0	0	0	0	0
244	2013-06-09	12094/2013	83	0	55	1.5	2.25	24.4444	1	0	0	0	0	1	2	2	1	0	0	0	1	0	2	0	35	2	0	0	0	2	0	1	167	110	4h30'	1	0	0	0	0	0	0	0	0	0	0	0	0	0
245	2013-06-07	12046/2013	84	1	75	1.7	2.89	25.9516	1	0	0	0	0	0	3	1	1	0	0	0	1	0	3	0	20	3	0	0	0	3	0	1	175	78	4h30'	1	0	0	0	0	0	0	0	0	0	0	0	0	0
246	2013-06-17	12655/2013	80	1	75	1.68	2.8224	26.5731	1	0	0	0	0	0	1	1	0	0	0	0	0	1	3	0	50	2	1	1	0	0	1	0	0	0	4h35'	1	0	0	0	0	0	0	0	0	0	0	0	0	0
247	2013-06-24	13190/2013	82	1	84	1.7	2.89	29.0657	1	0	0	0	0	0	1	2	0	0	1	0	0	1	1	0	65	1	0	0	0	1	0	1	122	78	4h22'	1	0	0	0	0	0	0	0	0	0	0	0	0	0
248	2013-06-24	13184/2013	84	1	76	1.66	2.7556	27.5802	1	0	0	0	0	0	3	2	0	0	0	0	1	0	2	0	67	2	1	0	0	1	0	1	50	28	3h40'	1	0	0	0	0	0	0	0	0	0	0	0	0	1
249	2013-12-18	25692/2013	93	0	65	1.63	2.6569	24.4646	0	1	0	0	0	0	4	1	1	1	0	0	0	1	2	0	45	3	0	0	0	3	0	1	135	94	3h	1	0	0	0	0	0	0	0	0	0	0	0	0	0
250	2013-12-11	24770/2013	83	1	80	1.8	3.24	24.6914	0	1	0	0	0	0	4	1	1	0	0	0	0	1	3	0	35	2	1	0	0	1	0	1	125	83	2h45'	0	1	0	0	1	0	0	0	0	0	0	0	0	0
251	2013-11-29	24713/2013	80	1	70	1.67	2.7889	25.0995	1	1	0	0	0	0	1	2	0	0	0	0	0	1	3	0	55	2	0	0	0	2	0	1	60	28	2h38'	1	0	0	0	0	0	0	0	0	0	0	0	0	1
252	2013-12-02	24832/2013	85	1	70	1.77	3.1329	22.3435	1	0	0	0	0	0	3	1	1	0	0	0	1	0	1	1	40	2	0	0	0	2	0	1	30	18	2h5'	1	0	0	0	0	0	0	0	0	0	0	0	0	0
253	2013-11-25	24406/2013	81	1	80	1.7	2.89	27.6817	1	0	0	0	0	0	4	1	1	0	0	0	1	0	3	1	42	3	1	0	0	2	0	1	97	47	2h17'	1	0	0	0	0	0	0	0	0	0	0	0	0	1
254	2013-11-23	24260/2013	80	1	85	1.65	2.7225	31.2213	1	0	0	0	0	0	1	1	1	0	1	1	1	0	3	0	38	2	1	0	0	1	0	1	58	29	1h38'	1	0	0	0	0	0	0	0	0	0	0	0	0	1
255	2013-11-19	23779/2013	80	0	85	1.53	2.3409	36.3108	1	1	1	0	0	1	1	1	0	0	1	1	0	1	1	1	73	1	0	0	0	1	0	1	165	109	4h	1	0	0	0	0	0	0	0	0	0	0	0	0	0
256	2013-11-19	23799/2013	80	1	110	1.78	3.1684	34.7178	1	0	0	0	0	0	2	3	1	1	1	0	0	1	2	1	35	2	0	0	0	2	0	1	100	31	2h45'	1	0	0	0	0	0	0	0	0	0	0	0	0	1
257	2013-11-04	22748/2013	80	0	83	1.52	2.3104	35.9245	1	1	0	0	0	0	3	2	1	0	0	0	0	1	2	1	45	3	1	0	0	2	0	1	120	62	2h45'	0	1	0	0	0	0	0	0	0	0	0	0	0	0
258	2013-10-31	22619/2013	80	1	52	1.63	2.6569	19.5717	1	0	0	0	0	0	3	2	2	0	1	0	0	1	3	0	40	3	0	0	0	3	0	1	94	49	2h55'	1	0	0	0	0	0	0	0	0	0	0	0	0	0
259	2013-10-30	22569/2013	81	1	64	1.68	2.8224	22.6757	1	0	0	0	0	0	1	2	0	0	0	0	0	1	2	0	70	1	0	0	0	1	0	1	165	112	6h	0	1	1	0	0	0	0	0	0	0	0	0	0	0
260	2013-10-29	22500/2013	86	0	69	1.58	2.4964	27.6398	1	1	0	0	0	0	2	1	1	0	0	0	1	0	3	0	35	3	0	0	0	3	0	1	80	44	2h25'	1	0	0	0	0	0	0	0	0	0	0	0	0	0
261	2013-10-28	22366/2013	82	1	85	1.66	2.7556	30.8463	1	0	0	0	0	0	3	3	1	0	0	0	0	1	1	0	55	1	1	0	0	0	0	1	139	75	3h45'	1	0	0	0	0	0	0	0	0	0	0	0	0	0
262	2013-10-28	22350/2013	85	1	66	1.61	2.5921	25.462	0	0	0	0	0	0	3	3	1	0	0	0	1	0	3	1	40	3	1	0	0	2	0	1	90	46	4h5'	1	0	0	0	0	0	0	0	0	0	0	0	0	0
263	2013-10-17	21698/2013	80	0	54	1.5	2.25	24	1	0	0	0	0	0	1	1	1	0	0	0	1	0	1	1	19	2	0	0	0	2	0	1	126	52	3h35'	1	0	0	0	0	0	0	0	0	0	0	0	0	0
264	2013-10-16	21380/2013	85	1	70	1.7	2.89	24.2215	1	0	0	0	0	0	3	3	1	0	0	0	0	1	3	1	55	2	0	0	0	2	0	1	45	22	3h	1	0	0	0	0	0	0	0	0	0	0	0	0	0
265	2013-10-10	20965/2013	80	0	67	1.53	2.3409	28.6215	1	1	0	0	0	0	3	3	2	4	1	0	0	1	3	0	60	2	0	0	0	2	0	1	48	23	3h20'	0	1	0	0	1	0	0	0	0	0	0	0	0	0
266	2013-10-09	20916/2013	82	1	70	1.74	3.0276	23.1206	1	0	0	0	0	0	2	1	0	0	0	0	0	1	3	0	60	3	1	0	0	2	0	1	85	52	2h10'	1	0	0	0	0	0	0	0	0	0	0	0	0	1
267	2013-10-04	20533/2013	86	1	61	1.6	2.56	23.8281	1	0	0	1	0	0	4	2	1	1	0	1	0	1	3	0	45	1	1	0	0	0	1	0	0	0	3h18'	1	0	0	0	0	0	0	0	0	0	0	0	0	1
268	2013-10-02	20366/2013	83	1	62	1.67	2.7889	22.231	1	1	0	0	0	0	2	2	1	1	0	0	0	1	2	1	40	2	0	0	0	2	0	1	60	32	2h	1	0	0	0	0	0	0	0	0	0	0	0	0	1
269	2013-09-23	19603/2013	81	1	74	1.64	2.6896	27.5134	1	1	0	0	0	0	2	1	2	0	1	1	0	1	3	1	45	2	1	0	0	1	0	1	65	34	3h10'	1	0	0	0	0	0	0	0	0	0	0	0	0	1
270	2013-09-20	18808/2013	81	1	89	1.72	2.9584	30.0838	1	0	0	1	0	0	1	3	2	0	0	0	0	1	3	0	45	2	1	0	0	1	0	1	65	33	3h31'	1	0	0	0	0	0	0	0	0	0	0	0	0	1
271	2013-09-19	18921/2013	80	1	56	1.65	2.7225	20.5693	1	0	0	0	0	0	4	1	1	0	0	0	0	1	1	0	40	1	1	0	0	0	0	1	40	23	1h	1	0	0	0	0	0	0	0	0	0	0	0	0	0
272	2013-09-13	18939/2013	80	0	85	1.58	2.4964	34.049	1	1	0	0	0	0	1	3	0	0	0	0	0	1	1	0	60	1	0	0	0	1	0	1	110	80	2h50'	1	0	0	0	0	0	0	0	0	0	0	0	0	0
273	2013-09-13	19053/2013	90	1	70	1.73	2.9929	23.3887	1	0	0	0	0	0	4	2	1	0	1	0	1	0	3	1	20	2	0	0	0	2	0	1	70	26	3h	0	1	0	0	0	0	0	0	0	1	0	0	0	0
274	2013-09-12/13	19003/2013	80	1	71	1.69	2.8561	24.8591	1	0	0	0	0	0	2	4	1	1	1	0	1	0	1	1	20	2	1	0	0	1	0	1	83	47	3h45'	0	1	0	1	0	0	0	0	0	1	0	0	0	0
275	2013-09-11	18642/2013	80	1	77	1.7	2.89	26.6436	1	0	0	0	0	0	2	1	1	1	0	0	0	1	2	0	60	1	1	0	0	0	1	0	0	0	1h	0	1	1		0	0	0	0	0	0	0	0	0	0
276	2013-09-10	18813/2013	81	0	70	1.53	2.3409	29.903	1	0	0	0	0	0	4	2	0	0	0	0	1	0	2	0	25	2	1	0	0	1	0	1	65	33	3h	1	0	0	0	0	0	0	0	0	0	0	0	0	0
277	2013-09-08	18580/2013	84	0	46	1.55	2.4025	19.1467	1	0	0	0	0	0	4	2	1	0	0	0	1	0	3	0	30	2	0	0	0	2	0	1	109	56	3h55'	0	1	0	0	0	0	0	0	0	1	1	0	1	0
278	2013-08-30	18016/2013	82	1	82	1.7	2.89	28.3737	1	0	0	0	0	0	4	3	1	0	0	0	1	0	2	1	40	2	0	0	0	2	0	1	65	32	1h50'	1	0	0	0	0	0	0	0	0	0	0	0	0	0
279	2013-08-21	17265/2013	83	1	84	1.66	2.7556	30.4834	1	1	0	0	0	0	3	2	0	0	1	1	0	1	3	0	60	2	0	0	0	2	0	1	70	31	2h50'	1	0	0	0	0	0	0	0	0	0	0	0	0	0
280	2013-08-19	17077/2013	80	1	54	1.56	2.4336	22.1893	1	0	0	0	0	0	2	2	1	0	0	0	0	1	2	0	60	2	0	0	0	2	0	1	61	27	2h10'	1	0	0	0	0	0	0	0	0	0	0	0	0	0
281	2013-08-19	17312/2013	82	1	74	1.67	2.7889	26.5338	1	0	0	0	0	0	4	4	2	0	1	0	1	0	3	0	28	3	0	0	0	3	0	1	111	41	3h35'	0	1	0	1	0	0	0	0	0	0	0	0	0	0
282	2013-08-05	16290/2013	80	1	70	1.7	2.89	24.2215	1	0	0	0	0	0	4	3	2	1	0	0	1	0	3	1	25	2	0	0	0	2	0	1	80	37	3h5'	1	0	0	0	0	0	0	0	0	0	0	0	0	0
283	2013-08-05	16275/2013	82	1	84	1.73	2.9929	28.0664	1	1	0	0	0	0	3	3	0	0	0	0	0	1	3	0	50	1	1	0	0	0	0	1	35	18	2h15'	1	0	0	0	0	0	0	0	0	0	0	0	0	1
284	2013-07-31	15985/2013	85	0	51	1.5	2.25	22.6667	1	0	0	0	0	0	2	1	1	1	0	0	0	1	2	0	40	4	1	0	0	3	0	1	159	97	5h	1	0	0	0	0	0	0	0	0	0	0	0	0	0
285	2013-07-29	15670/2013	84	1	76	1.68	2.8224	26.9274	1	0	0	0	0	0	3	3	1	0	1	0	0	1	3	1	30	1	0	0	0	1	0	1	56	27	1h50'	0	1	0	0	0	0	0	0	0	0	0	0	1	0
286	2013-07-25	15590/2013	83	0	66	1.6	2.56	25.7812	1	1	0	0	0	0	4	4	2	0	0	0	1	0	3	0	40	2	0	0	0	2	0	1	60	36	2h50'	1	0	0	0	0	0	0	0	0	0	0	0	0	0
287	2013-07-22/23	15399/2013	87	0	94	1.76	3.0976	30.3461	1	1	0	0	0	0	4	4	1	0	0	0	1	0	0	1	40	3	0	0	0	3	0	1	295	82	7h10'	1	0	0	0	0	0	0	0	0	0	0	0	1	0
288	2013-07-19	15123/2013	83	1	75	1.57	2.4649	30.4272	1	1	0	0	0	0	2	2	0	0	1	1	0	1	3	0	50	2	0	0	0	2	0	1	83	52	2h13'	0	1	0	0	0	1	1	0	0	0	0	0	0	0
289	2013-07-19	15232/2013	84	1	50	1.7	2.89	17.301	1	1	0	0	0	1	4	3	1	0	0	0	1	0	3	1	25	2	0	0	0	2	0	1	102	30	1h42'	0	1	0	0	1	0	0	0	0	0	0	0	0	0
290	2013-07-12	14601/2013	80	0	60	1.56	2.4336	24.6548	1	0	0	0	0	0	2	2	1	0	0	0	0	1	3	0	62	2	0	0	0	2	0	1	80	28	2h23'	1	0	0	0	0	0	0	0	0	0	0	0	0	0
291	2013-07-14	13190/2013	82	1	84	1.7	2.89	29.0657	1	0	0	0	0	0	1	2	0	0	1	0	0	1	1	0	65	1	0	0	0	1	0	1	122	78	6h22'	1	0	0	0	0	0	0	0	0	0	0	0	0	0
292	2013-07-11	14564/2013	80	1	87	1.68	2.8224	30.8248	1	0	0	0	0	0	3	1	1	0	0	0	0	1	3	0	60	2	0	0	0	2	0	1	93	64	4h10'	1	0	0	0	0	0	0	0	0	0	0	0	0	1
293	2013-07-08	14085/2013	88	0	60	1.56	2.4336	24.6548	1	0	0	0	0	0	4	1	1	0	0	0	0	1	2	1	60	2	0	0	0	2	0	1	87	27	2h40'	1	0	0	0	0	0	0	0	0	0	0	0	0	0
294	2013-07-05	13725/2013	81	0	75	1.6	2.56	29.2969	1	1	0	0	0	0	2	1	0	0	0	0	0	1	1	0	40	2	0	0	0	2	0	1	54	24	4h	1	0	0	0	0	0	0	0	0	0	0	0	0	0
295	2013-07-01	13750/2013	88	0	86	1.65	2.7225	31.5886	1	1	0	0	0	0	4	2	2	1	1	0	1	0	3	1	40	2	0	0	0	2	0	1	95	21	3h10'	1	0	0	0	0	0	0	0	0	0	0	0	0	0
296	2014-06-30	14597/2014	85	1	77	1.65	2.7225	28.2828	1	0	0	0	0	0	3	3	1	0	0	1	0	1	3	1	40	1	1	0	0	0	1	0	0	0	2h35'	0	1	0	0	0	0	0	0	0	0	0	1	0	0
297	2014-06-25	14258/2014	84	1	68	1.63	2.6569	25.5937	1	1	0	0	0	0	4	3	2	1	0	0	0	1	2	1	45	2	0	0	0	2	0	1	76	38	2h50'	1	0	0	0	0	0	0	0	0	0	0	0	0	0
298	2014-06-25	14288/2014	83	1	86	1.66	2.7556	31.2092	1	0	0	0	0	0	3	2	0	0	0	0	0	1	2	0	48	2	0	0	0	2	0	1	73	28	4h45'	1	0	0	0	0	0	0	0	0	0	0	0	0	1
299	2014-06-25	14279/2014	83	1	79	1.71	2.9241	27.0169	1	0	0	0	0	0	2	2	0	0	0	0	0	1	3	1	30	2	1	0	0	1	0	1	55	36	1h45'	1	0	0	0	0	0	0	0	0	0	0	0	0	1
300	2014-06-24	14191/2014	85	1	79	1.73	2.9929	26.3958	1	1	0	1	0	0	4	2	1	0	1	0	0	1	3	1	50	1	1	0	0	0	1	0	0	0	3h15'	1	0	0	0	0	0	0	0	0	0	0	0	0	1
301	2014-06-23	14063/2014	82	1	90	1.74	3.0276	29.7265	1	0	0	0	0	0	2	2	0	0	0	0	0	1	3	0	50	2	1	0	0	1	0	1	40	26	2h20'	1	0	0	0	0	0	0	0	0	0	0	0	0	0
302	2014-06-22	14040/2014	80	1	80	1.7	2.89	27.6817	1	0	0	0	0	0	3	1	0	0	0	0	0	1	1	1	55	2	1	0	0	1	0	1	52	25	2h35'	1	0	0	0	0	0	0	0	0	0	0	0	0	1
303	2014-06-21	13783/2014	83	1	72	1.56	2.4336	29.5858	1	1	0	0	1	1	4	4	1	2	0	0	1	0	3	1	60	3	0	0	0	3	0	1	90	48	3h20'	1	0	0	0	0	0	0	0	0	0	0	0	1	0
304	2014-06-13/14	13564/2014	84	1	70	1.62	2.6244	26.6728	1	0	0	0	0	0	3	2	0	0	0	0	1	0	3	0	43	2	1	0	0	1	0	1	82	36	3h	1	0	0	0	0	0	0	0	0	0	0	0	0	0
305	2014-0613	13508/2014	84	1	66	1.6	2.56	25.7812	0	0	0	0	0	0	4	2	0	0	0	0	1	0	3	1	40	3	1	0	0	2	0	1	146	50	3h25'	1	0	0	0	0	0	0	0	0	0	0	0	0	1
306	2014-06-02	11675/2014	81	0	60	1.6	2.56	23.4375	1	0	0	0	0	0	2	2	1	1	1	0	0	1	3	0	60	3	0	0	0	3	0	1	90	46	3h30'	1	0	0	0	0	0	0	0	0	0	0	0	0	0
307	2014-05-25	11659/2014	80	0	77	1.6	2.56	30.0781	1	0	0	0	0	0	2	2	2	0	0	0	1	0	3	0	50	2	1	0	0	1	0	1	44	25	3h30'	1	0	0	0	0	0	0	0	0	0	0	0	0	1
308	2014-05-24	11581/2014	80	0	55	1.5	2.25	24.4444	1	0	0	0	0	0	4	2	1	0	0	0	1	0	3	0	40	2	0	0	0	2	0	1	60	28	1h40'	0	1	1	0	0	0	0	0	0	0	0	0	1	0
309	2014-05-22	11427/2014	82	1	71	166	27556	0.00257657	1	1	0	0	0	0	2	1	1	0	0	0	0	1	3	1	54	2	0	0	0	2	0	1	70	28	3h55'	1	0	0	0	0	0	0	0	0	0	0	0	0	0
310	2014-05-12	10312/2014	82	1	73	1.78	3.1684	23.04	0	0	0	0	0	0	3	3	2	0	1	1	0	1	1	0	30	2	0	0	0	2	0	1	228	105	6h20'	1	0	0	0	0	0	0	0	0	0	0	0	0	0
311	2014-05-06	9942/2014	83	0	90	1.58	2.4964	36.0519	1	0	0	0	0	0	3	2	1	0	0	0	0	1	3	1	45	2	1	0	0	1	0	1	70	26	4h30'	1	0	0	0	0	0	0	0	0	0	0	0	0	0
312	2014-04-30	9578/2014	80	1	68	1.56	2.4336	27.9421	1	0	0	0	0	0	3	2	0	1	0	0	0	1	3	1	60	2	0	0	0	2	0	1	166	100	5h5'	1	0	0	0	0	0	0	0	0	0	0	0	0	1
313	2014-05-02	9712/2014	81	1	70	1.65	2.7225	25.7117	1	0	0	0	0	0	2	1	0	0	0	0	0	1	2	1	40	2	0	0	0	2	0	1	46	16	1h42'	1	0	0	0	0	0	0	0	0	0	0	0	0	0
314	2014-04-29	9437/2014	82	0	55	1.53	2.3409	23.4952	0	0	0	0	0	0	3	3	0	0	1	1	0	1	3	0	55	1	0	0	0	1	0	1	78	56	2h20'	1	0	0	0	0	0	0	0	0	0	0	0	0	1
315	2014-04-24	9071/2014	81	0	70	1.68	2.8224	24.8016	1	0	0	0	0	0	1	1	1	0	0	1	0	1	3	0	50	2	1	0	0	1	0	1				1	0	0	0	0	0	0	0	0	0	0	0	0	0
316	2014-04-17	12489/2014	81	0	65	1.6	2.56	25.3906	1	0	0	0	0	0	4	1	1	0	0	0	0	1	3	1	35	2	0	0	0	2	0	1	120	54	2h40'	1	0	0	0	0	0	0	0	0	0	0	0	0	0
317	2014-04-16	8504/2014	82	1	91	1.69	2.8561	31.8616	1	0	0	0	0	0	3	2	2	0	0	0	0	1	3	1	45	2	0	0	0	2	0	1	63	29	3h5'	1	0	0	0	0	0	0	0	0	0	0	0	0	0
318	2014-04-08	7906/2014	82	1	72	1.69	2.8561	25.2092	1	0	0	0	0	0	4	1	1	0	1	0	0	1	2	0	45	3	1	0	0	2	0	1	60	37	2h50'	1	0	0	0	0	0	0	0	0	0	0	0	0	0
319	2014-04-03	7488/2014	81	1	85	1.65	2.7225	31.2213	1	1	0	0	0	0	3	2	0	0	0	1	0	1	3	0	53	3	1	0	0	2	0	1	109	60	4H25'	1	0	0	0	0	0	0	0	0	0	0	0	0	0
320	2014-04-01	7240/2014	81	0	85	1.6	2.56	33.2031	1	1	0	0	0	0	3	2	0	0	0	0	0	1	3	0	50	3	1	0	0	2	0	1	97	54	4H	1	0	0	0	0	0	0	0	0	0	0	0	0	0
321	2014-04-01	7246/2014	80	1	71	1.65	2.7225	26.079	1	0	0	0	0	0	2	3	0	0	0	0	0	1	1	0	25	2	0	0	0	2	0	1	71	26	2H25'	1	0	0	0	0	0	0	0	0	0	0	0	0	0
322	2014-03-28	7062/2014	86	0	70	1.5	2.25	31.1111	1	0	0	0	0	0	1	1	1	0	0	0	0	1	3	0	40	2	0	0	0	2	0	1	60	24	2H	0	1	1	0	0	0	0	0	0	0	0	0	0	0
323	2014-03-27	6894/2014	82	1	86	1.76	3.0976	27.7634	1	0	1	0	0	0	3	1	1	0	0	0	1	0	3	0	45	2	0	0	0	2	0	1	58	33	2H45'	1	0	0	0	0	0	0	0	0	0	0	0	0	0
324	2014-03-27	6882/2014	80	1	71	1.68	2.8224	25.1559	1	0	0	0	0	0	2	2	0	0	0	1	0	1	3	0	75	2	1	0	0	1	0	1	70	34	3H10'	1	0	0	0	0	0	0	0	0	0	0	0	0	1
325	2014-03-24	6888/2014	84	0	69	1.51	2.2801	30.2618	1	1	0	0	0	0	3	1	2	0	0	0	1	0	3	1	70	2	0	0	0	2	0	1	40	19	2H10'	1	0	0	0	0	0	0	0	0	0	0	0	0	0
326	2014-03-25	6758/2014	82	1	69	1.56	2.4336	28.3531	1	0	0	0	0	0	2	1	0	0	0	0	1	0	1	0	59	2	1	0	0	1	0	1	64	40	4H	1	0	0	0	0	0	0	0	0	0	0	0	0	0
327	2014-03-23	6510/2014	81	1	90	1.86	3.4596	26.0146	1	0	0	0	0	0	1	1	1	1	0	0	1	0	1	0	42	2	0	0	0	2	0	1	54	24	2H50'	1	0	0	0	0	0	0	0	0	0	0	0	0	1
328	2014-03-20	6071/2014	82	1	94	1.71	2.9241	32.1466	1	0	0	0	0	0	2	2	0	0	0	0	0	1	1	0	65	2	1	0	0	1	0	1	54	28	1H30'	0	1	0	0	0	0	1	0	0	0	0	0	0	1
329	2014-03-17	5383/2014	84	1	85	1.62	2.6244	32.3884	1	0	0	0	0	0	3	2	0	0	0	0	0	1	3	0	49	2	1	0	0	1	0	1	67	36	1H50'	1	0	0	0	0	0	0	0	0	0	0	0	0	0
330	2014-03-10	5296/2014	88	1	69	1.68	2.8224	24.4473	1	1	1	0	0	0	4	1	1	1	0	0	0	1	3	1	45	2	0	0	0	2	0	1	91	40	1H55'	1	0	0	0	0	0	0	0	0	0	0	0	0	0
331	2014-03-07	5189/2014	85	0	54	1.6	2.56	21.0937	1	1	0	0	0	0	0	0	0	0	0	0	0	1	3	0	50	2	0	0	0	2	0	1	48	30	3h55'	1	0	0	0	0	0	0	0	0	0	0	0	0	0
332	2014-02-28	4663/2014	84	1	72	1.65	2.7225	26.4463	0	0	0	0	0	0	0	3	1	0	0	0	1	0	3	1	43	2	0	0	0	2	0	1	54	27	2h	0	1	1	0	0	0	0	0	0	0	0	0	0	0
333	2014-02-11	3125/2014	83	1	70	1.7	2.89	24.2215	1	0	0	0	0	0	3	3	0	1	0	0	0	1	3	1	65	2	0	0	0	2	0	1	85	31	3H	0	1	1	0	0	0	0	0	0	0	0	0	0	0
334	2014-02-21	3999/2014	84	0	53	1.5	2.25	23.5556	1	0	0	1	0	0	3	2	1	0	0	0	0	1	1	0	40	1	1	0	0	0	0	1	55	28	3h10'	1	0	0	0	0	0	0	0	0	0	0	0	0	0
335	2014-02-20	3341/2014	80	0	70	1.58	2.4964	28.0404	1	0	0	0	0	0	3	1	0	0	0	0	0	1	2	0	60	1	1	0	0	0	0	1	33	15	2h20'	1	0	0	0	0	0	0	0	0	0	0	0	0	0
336	2014-02-20	3943/2014	84	1	62	1.65	2.7225	22.7732	1	0	0	0	0	0	4	3	1	0	0	0	1	0	3	0	40	2	1	0	0	1	0	1	65	27	2h25'	0	1	0	0	0	0	0	0	0	0	0	0	0	0
337	2014-02-14	3124/2014	83	1	85	1.8	3.24	26.2346	1	0	0	0	0	0	2	4	1	0	0	1	1	0	3	0	15	2	0	0	0	2	0	1	180	109	4h55'	0	1	0	0	1	0	0	0	0	0	0	0	1	0
338	2014-02-13	3241/2014	83	1	78	1.56	2.4336	32.0513	1	0	0	0	0	0	1	3	0	0	0	0	0	1	1	0	40	1	0	0	0	1	0	1	139	88	4H25'	1	0	0	0	0	0	0	0	0	0	0	0	0	0
339	2014-02-10	2970/2014	83	1	71	1.7	2.89	24.5675	1	0	0	0	0	0	2	2	0	0	0	0	0	1	3	1	55	2	1	0	0	1	0	1	60	30	3h10'	1	0	0	0	0	0	0	0	0	0	0	0	0	1
340	2014-02-07	2872/2014	86	1	80	1.75	3.0625	26.1224	1	0	0	0	0	0	3	2	1	0	1	0	0	1	3	1	45	3	0	0	0	3	0	1	126	53	5h9'	1	0	0	0	0	0	0	0	0	0	0	0	0	0
341	2014-02-06	2394/2014	82	1	80	1.71	2.9241	27.3588	1	0	0	0	0	0	1	2	0	0	0	1	0	1	3	0	50	3	0	0	0	3	0	1	110	50	3h55'	0	1	1	0	0	0	0	0	0	0	0	0	0	0
342	2014-02-03	2534/2014	82	0	64	1.74	3.0276	21.1389	0	0	0	0	0	0	3	1	0	0	0	0	1	0	2	1	30	2	0	0	0	2	0	1	170	33	4h5'	1	0	0	0	0	0	0	0	0	0	0	0	0	0
343	2014-01-27	1876/2014	87	1	74	1.7	2.89	25.6055	1	0	0	0	0	0	2	1	1	0	0	0	0	1	3	0	38	3	0	0	0	3	0	1	122	62	4h7'	0	1	0	0	1	0	0	0	1	1	1	0	0	0
344	2014-01-23	1408/2014	83	1	75	1.7	2.89	25.9516	0	0	0	1	0	0	2	2	0	0	0	0	0	1	1	0	55	1	1	0	0	0	0	1	195	96	5h20'	0	1	0	0	1	0	0	0	0	0	0	0	0	0
345	2014-01-17	1127/2014	80	1	78	1.67	2.7889	27.968	1	0	0	0	0	0	2	2	0	0	0	0	0	1	1	0	65	1	0	0	0	1	0	1	95	66	2h45'	0	1	1	0	0	0	0	0	0	0	0	0	0	0
346	2014-01-17	1234/2014	81	1	74	1.61	2.5921	28.5483	1	0	0	0	0	0	3	1	0	0	0	0	1	0	3	1	58	3	1	0	0	2	0	1	130	65	7h12'	1	0	0	0	0	0	0	0	0	0	0	0	0	0
347	2014-01-13	716/2014	81	1	74	1.74	3.0276	24.4418	1	0	0	1	0	0	3	3	1	2	0	1	0	1	3	0	30	2	1	0	0	1	0	1	90	65	2h30'	1	0	0	0	0	0	0	0	0	0	0	0	0	1
348	2014-01-13	332/2014	81	1	90	1.78	3.1684	28.4055	1	1	0	0	0	1	4	1	1	2	0	0	1	0	3	0	55	3	0	0	0	3	0	1	127	54	3h2'	1	0	0	0	0	0	0	0	0	0	0	0	0	0
349	2014-01-10	579/2014	84	0	55	1.51	2.2801	24.1217	1	0	0	0	0	0	0	3	0	0	0	0	0	1	1	0	50	1	0	0	0	1	0	1	112	76	3h	1	0	0	0	0	0	0	0	0	0	0	0	0	0
350	2014-01-07	64/2014	80	0	85	1.56	2.4336	34.9277	1	0	0	0	0	0	2	1	1	2	1	0	0	1	1	1	58	3	1	0	0	2	0	1	65	36	3h15'	1	0	0	0	0	0	0	0	0	0	0	0	0	1
351	2014-12-20/21	29557/2014	82	0	79	1.52	2.3104	34.1932	0	0	0	0	0	0	3	1	1	0	0	0	1	0	1	1	42	2	0	0	0	2	0	1	95	37	2h15'	1	0	0	0	0	0	0	0	0	0	0	0	0	0
352	2014-12-18	28484/2014	91	1	70	1.68	2.8224	24.8016	1	0	0	0	0	0	3	1	0	0	0	0	0	1	1	0	50	2	0	0	0	2	0	1	50	35	1h50'	1	0	0	0	0	0	0	0	0	0	0	0	0	0
353	2014-12-16	29054/2014	82	0	68	1.56	2.4336	27.9421	1	1	0	0	0	0	2	1	0	0	0	0	0	1	3	0	50	2	0	0	0	2	0	1	89	35	2h35'	1	0	0	0	0	0	0	0	0	0	0	0	0	1
354	2014-11-14	26311/2014	90	1	80	1.74	3.0276	26.4236	1	0	0	0	0	0	2	2	1	0	0	0	1	0	3	1	55	2	0	0	0	2	0	1	80	30	3H45'	0	1	1	0	0	0	0	0	0	0	0	0	0	0
355	2014-11-03	25295/2014	80	1	64	1.69	2.8561	22.4082	1	0	0	0	0	0	3	2	1	0	0	0	0	1	3	1	40	3	1	0	0	2	0	1	125	51	4H15'	1	0	0	0	0	0	0	0	0	0	0	0	0	1
356	2014-11-03	25117/2014	82	1	79	1.74	3.0276	26.0933	1	0	0	0	0	0	2	1	0	0	0	0	0	1	3	1	52	3	0	0	0	3	0	1	70	40	2h30'	1	0	0	0	0	0	0	0	0	0	0	0	0	0
357	2014-10-31	24789/2014	82	1	60	1.6	2.56	23.4375	1	0	0	0	0	0	4	2	3	0	0	0	0	1	1	1	50	2	1	0	0	1	0	1	52	22	3h20'	1	0	0	0	0	0	0	0	0	0	0	0	0	0
358	2014-10-30	24182/2014	85	1	62	1.76	3.0976	20.0155	1	0	0	0	0	1	4	3	1	0	0	0	1	0	2	1	40	2	0	0	0	2	0	1	160	117	4h50'	1	0	0	0	0	0	0	0	0	0	0	0	0	0
359	2014-10-24	24544/2014	83	0	76	1.6	2.56	29.6875	1	1	0	0	0	0	3	1	0	0	0	0	0	1	2	0	66	3	1	0	0	2	0	1	82	44	4h	1	0	0	0	0	0	0	0	0	0	0	0	0	0
360	2014-10-24	24553/2014	82	1	95	1.7	2.89	32.872	0	1	0	0	0	0	3	0	0	0	0	0	0	1	3	0	60	2	1	0	0	1	0	1	79	55	3h10'	1	0	0	0	0	0	0	0	0	0	0	0	0	1
361	2014-10-23	24376/2014	81	1	60	1.58	2.4964	24.0346	1	1	0	0	0	0	2	1	1	0	1	0	0	1	3	0	60	2	0	0	0	2	0	1	71	28	2h55'	0	1	0	0	0	0	0	0	1	1	1	0	1	0
362	2014-10-21	24224/2014	80	0	58	1.58	2.4964	23.2335	1	0	0	0	0	0	4	2	1	1	0	0	1	0	1	0	60	1	1	0	0	0	0	1	37	15	1h	1	0	0	0	0	0	0	0	0	0	0	0	0	0
363	2014-10-20	23999/2014	83	1	78	1.7	2.89	26.9896	1	1	0	0	0	1	2	1	0	0	0	0	0	1	3	0	65	3	1	0	0	2	0	1	95	50	3h40'	1	0	0	0	0	0	0	0	0	0	0	0	0	0
364	2014-10-15	23667/2014	80	0	63	1.59	2.5281	24.9199	1	1	0	0	0	0	3	1	0	0	0	0	0	1	3	0	72	2	1	0	0	1	0	1	63	39	2h	1	0	0	0	0	0	0	0	0	0	0	0	0	0
365	2014-09-29	22185/2014	87	0	78	1.5	2.25	34.6667	1	1	0	0	0	0	3	1	4	0	0	0	0	1	3	0	65	2	0	0	0	2	0	1	79	34	4h30'	1	0	0	0	0	0	0	0	0	0	0	0	0	0
366	2014-09-25	21282/2014	83	1	80	1.62	2.6244	30.4832	1	1	0	0	0	0	3	2	0	0	1	0	0	1	3	0	50	2	0	0	0	2	0	1	85	35	5h6'	1	0	0	0	0	0	0	0	0	0	0	0	0	0
367	2014-09-24	21556/2014	80	0	57	1.5	2.25	25.3333	1	0	0	0	0	0	1	1	0	1	0	0	0	1	2	0	65	1	0	0	0	1	0	1	225	142	4h30'	0	1	0	1	1	0	0	0	0	0	0	1	0	0
368	2014-09-15	20997/2014	88	0	70	1.52	2.3104	30.2978	1	0	0	0	0	0	3	3	0	0	0	0	1	0	1	0	53	1	1	0	0	0	0	1	145	105	5h40'	1	0	0	0	0	0	0	0	0	0	0	0	0	0
369	2014-09-12	20780/2014	80	1	73	1.65	2.7225	26.8136	1	1	0	0	0	0	3	3	2	3	0	1	0	1	3	1	48	2	0	0	0	2	0	1	94	58	2h35'	1	0	0	0	0	0	0	0	0	0	0	0	0	1
370	2014-09-11	20494/2014	83	1	69	1.58	2.4964	27.6398	1	0	0	0	0	1	2	2	2	0	0	0	0	1	3	0	30	2	0	0	0	2	0	1	60	23	2hj20'	1	0	0	0	1	0	0	0	0	0	1	0	1	0
371	2014-09-11	20791/2014	81	1	92	1.82	3.3124	27.7744	1	0	0	0	0	0	3	2	1	0	0	0	0	1	3	0	55	2	0	0	0	2	0	1	78	28	3h45'	1	0	0	0	0	0	0	0	0	0	0	0	0	1
372	2014-09-10	20657/2014	82	1	80	1.73	2.9929	26.7299	1	0	0	0	0	0	2	2	1	0	0	0	1	0	3	1	25	3	0	0	0	3	0	1	103	42	3h30'	1	0	0	0	0	0	0	0	0	0	0	0	0	0
373	2014-09-05	20294/2014	84	1	72	1.7	2.89	24.9135	1	1	0	0	0	0	3	2	2	2	1	0	0	1	3	0	50	2	0	0	0	2	0	1	100	42	4h45'	0	1	1	0	0	0	0	0	0	0	0	0	0	0
374	2014-08-26	19527/2014	80	1	93	1.78	3.1684	29.3524	1	1	0	0	0	0	3	3	1	0	1	1	1	0	3	1	25	2	0	0	0	2	0	1	86	40	4h	0	1	0	0	0	0	0	0	0	0	0	0	1	0
375	2014-08-21	19062/2014	82	0	60	1.58	2.4964	24.0346	0	0	0	0	0	0	3	2	2	0	0	1	0	1	3	0	60	3	0	0	0	3	0	1	140	63	4h50'	1	0	0	0	0	0	0	0	0	0	0	0	0	0
376	2014-08-21	19161/2014	84	1	75	1.65	2.7225	27.5482	1	0	0	0	0	1	4	1	1	0	1	0	1	0	3	0	40	2	1	0	0	1	0	1	61	31	8h13'	1	0	0	0	0	0	0	0	0	0	0	0	0	0
377	2014-08-20	18784/2014	83	1	66	1.62	2.6244	25.1486	0	0	0	0	0	0	3	2	0	0	1	0	0	1	3	1	35	2	1	0	0	1	0	1	67	36	3h10'	1	0	0	0	0	0	0	0	0	0	0	0	0	1
378	2014-08-16	18573/2014	85	1	68	1.54	2.3716	28.6726	1	0	0	0	0	0	4	1	0	0	0	0	1	0	3	1	60	3	0	0	0	3	0	1	100	45	3h15'	1	0	0	0	0	0	0	0	0	0	0	0	0	0
379	2014-08-01	17459/2014	82	1	79	1.68	2.8224	27.9904	1	0	0	0	0	0	3	2	0	0	0	0	0	1	1	0	60	2	1	0	0	1	0	1	79	39	3h35'	1	0	0	0	0	0	0	0	0	0	0	0	0	1
380	2014-07-29	17240/2014	82	1	82	1.75	3.0625	26.7755	1	0	0	0	0	0	2	2	1	0	0	1	1	0	2	0	40	2	1	0	0	1	0	1	156	85	5h15'	1	0	0	0	0	0	0	0	0	0	0	0	0	0
381	2014-07-08	15510/2014	81	1	87	1.86	3.4596	25.1474	1	0	0	0	0	0	4	1	1	0	0	0	1	0	2	0	40	2	1	0	0	1	0	1	92	52	2h32'	1	0	0	0	0	0	0	0	0	0	0	0	0	0
382	2015-01-20	1422/2015	82	1	79	1.8	3.24	24.3827	1	1	0	0	0	0	2	2	0	0	0	0	0	1	2	0	60	2	0	0	0	2	0	1	65	38	3h55'	1	0	0	0	0	0	0	0	0	0	0	0	0	0
383	2015-01-16	1138/2015	84	1	69	1.7	2.89	23.8754	1	0	0	0	0	0	3	2	1	0	0	0	0	1	1	1	45	1	0	0	0	1	0	1	157	103	4h15'	1	0	0	0	0	0	0	0	0	0	0	0	0	0
384	2015-01-16	1083/2015	83	1	72	1.8	3.24	22.2222	1	1	1	0	0	0	3	1	0	0	1	0	0	1	1	1	55	1	0	0	0	1	0	1	152	99	5h	1	0	0	0	1	0	0	0	0	0	0	0	1	0
385	2015-01-16	1246/2015	90	1	70	1.68	2.8224	24.8016	1	0	0	0	0	0	1	2	0	0	0	0	1	0	2	1	35	2	0	0	0	2	0	1	54	21	2h4'	1	0	0	0	0	0	0	0	0	0	0	0	0	0
386	2015-01-14	481/2015	80	1	78	1.81	3.2761	23.8088	1	0	1	0	0	0	2	2	0	0	0	0	1	0	1	1	45	1	0	0	0	1	0	1	62	35	2h30'	1	0	0	0	0	0	0	0	0	0	0	0	0	0
387	2015-01-09	471/2015	87	0	49	1.42	2.0164	24.3007	1	0	0	0	0	0	3	2	1	2	0	0	0	1	3	0	40	3	0	0	0	3	0	1	123	67	3h40'	1	0	0	0	1	0	0	0	0	0	0	0	0	0
388	2015-01-08	364/2015	82	0	85	1.65	2.7225	31.2213	0	0	0	0	0	0	2	2	2	1	0	0	1	0	2	0	20	2	0	0	0	2	0	1	185	109	4h35'	1	0	0	0	0	0	0	0	0	0	0	0	0	0
[truncated: 3 more columns]
